1                   **Organelle calcium-derived voltage oscillations in pacemaker**  
2                   **neurons drive food-seeking behavior in *Aplysia***

3  
4  
5  
6                   **Alexis Bédécarrats, Laura Puygrenier, John Castro O'Byrne, Quentin Lade, John Simmers,**  
7                   **Romuald Nargeot**

8                   Univ. Bordeaux, INCIA, UMR 5287, F-33076 Bordeaux, France.

9                   CNRS, INCIA, UMR 5287, F-33076 Bordeaux, France.

10  
11  
12                   **For correspondence:**

13                   Dr Romuald Nargeot,

14                   Institut de Neurosciences Cognitives et Intégratives d'Aquitaine (INCIA)

15                   Université de Bordeaux, CNRS - UMR 5287

16                   Zone nord - bâtiment 2AB - 2ème étage

17                   BP 22

18                   146 rue Léo Saignat

19                   33076 BORDEAUX Cedex

20                   E-mail: [romuald.nargeot@u-bordeaux.fr](mailto:romuald.nargeot@u-bordeaux.fr)

21

22

23

24

25

26

## 27 **Abstract**

28 The expression of motivated behaviors depends on both external and internally-arising neural  
29 stimuli, yet the intrinsic releasing mechanisms for such variably occurring behaviors remain  
30 elusive. In isolated nervous system preparations of *Aplysia*, we have found that irregularly  
31 expressed cycles of motor output underlying food-seeking behavior arise from regular  
32 membrane potential oscillations of varying magnitude in an identified pair of interneurons  
33 (B63) in the bilateral buccal ganglia. This rhythmic signal, which is endogenous and specific to  
34 the B63 cells, is generated by organelle-derived intracellular calcium fluxes that activate  
35 voltage-independent plasma membrane channels. The resulting voltage oscillation spreads  
36 throughout a subset of gap junction-coupled buccal network neurons and by triggering plateau  
37 potential-mediated bursts in B63, can initiate motor output driving food-seeking action. Thus,  
38 an atypical neuronal pacemaker mechanism, based on rhythmic intracellular calcium store  
39 release and intercellular propagation, can act as an autonomous intrinsic releaser for the  
40 occurrence of a motivated behavior.

41

42

43

## 44 Introduction

45 Motivated behaviors, such as feeding or sexual activity, are triggered by an interplay between  
46 impulsive signals originating within the central nervous system (CNS), peripheral stimuli such as  
47 sensory cues, and the positive or negative consequences of an act (Balleine, 2019; Berridge,  
48 2019, 2004; Dickinson and Balleine, 1994; Fujimoto et al., 2019). This combination of flexible  
49 extrinsic and intrinsic neural releasers determines both the likelihood of occurrence and the  
50 selection of action patterns, which in turn imparts irregularity to the expressed goal-directed  
51 behavior. However, depending on sensory experience motivated behaviors can be transformed  
52 from variable to regular, rhythmically repeating action patterns that lead to the expression of  
53 habits, routines, or compulsive behaviors. The production of such stereotyped repetitive  
54 behavior, often reinforced by associative learning processes, is considered to become more  
55 strongly dependent upon an automatic internally-arising drive and less sensitive to the sensory  
56 consequences of the executed action (Balleine, 2019; Balleine and Dezfouli, 2019; Everitt and  
57 Robbins, 2016, 2005). Although the contribution of internal drives to the induction of motivated  
58 behavior is recognized, unanswered questions remain about their neural origin and whether  
59 the highly flexible expression of a motivated behavior relies on similar inherent neuronal  
60 processes as found for rhythmic behaviors generally (Grillner and El Manira, 2020; Marder et  
61 al., 2015; Selverston, 2010; Steuer and Guertin, 2019).

62 A suitable animal model for addressing such issues is the sea slug *Aplysia*, in which  
63 aspects of feeding behavior are generated by a well characterized neuronal network within the  
64 buccal ganglia. In the absence of food stimuli, *Aplysia* spontaneously expresses food-seeking  
65 behavior, which in addition to locomotor and head-waving movements, includes buccal and

66 radula (a tongue-like organ) biting movements emitted at highly irregular intervals  
67 (Kupfermann, 1974). This spontaneous and variable behavior can be regulated by operant-  
68 reward conditioning that leads to the expression of regular and rhythmic biting movements  
69 (Brembs et al., 2002; Costa et al., 2020; Nargeot et al., 2007; Sieling et al., 2014). Importantly,  
70 neural correlates of this motivated behavior continue to be expressed by the underlying  
71 neuronal network in the isolated buccal ganglia, thereby enabling the mechanisms responsible  
72 for autonomously driving both the irregular and regular emissions of radula movement cycles  
73 to be analyzed at the cellular and synaptic levels (McManus et al., 2019; Nargeot and Simmers,  
74 2012). Identified components of this central pattern generator (CPG) circuit, such as the  
75 electrically-coupled B63, B30, B31/32 neurons, were previously found to be essential  
76 contributors to the decision-making process that drives radula motor output (Costa et al., 2020;  
77 Hurwitz et al., 1997; Jing et al., 2004; Nargeot et al., 2009; Sieling et al., 2014; Susswein and  
78 Byrne, 1988). Among these elements, the two bilateral B63 interneurons are the only cells  
79 whose spontaneous production of an action potential burst is necessary and sufficient to trigger  
80 each radula output cycle (Nargeot et al., 2009). Thus, deciphering the mechanisms underlying  
81 the endogenous bursting activity of these key decision neurons is critical to understanding the  
82 process of radula motor pattern expression. Although B63 bursting and buccal network activity  
83 were previously found to rely on the cell's plateau potential-generating capability and its  
84 electrical synapses with other circuit neurons (Sieling et al., 2014; Susswein et al., 2002), the  
85 mechanism responsible for spontaneously triggering B63 plateaus and consequently the  
86 irregular emission of motor output remains unknown. Our findings reported here indicate that  
87 such motor pattern genesis relies on a voltage-insensitive pacemaker mechanism originating



88 from organelle-driven fluxes in intracellular calcium that is specific to this homologous pair of  
89 neurons.

90

## 91 **Results**

92 Motor output responsible for radula biting behavior, which in the absence of any food  
93 stimulation consists of irregularly recurring cycles of radula protraction, closure and retraction  
94 (Figure 1A), continues to be expressed by identified CPG circuitry in isolated buccal ganglia  
95 (Figure 1B) and can be recorded from the corresponding buccal motor nerves (Figure 1C).  
96 Individual radula bites are instigated by synchronous impulse burst activity in the two bilateral,  
97 electrically-coupled B63 interneurons that via electrical and chemical synapses with their ipsi-  
98 and contralateral buccal network partners, are able to trigger the two-phase buccal motor  
99 pattern (BMP) for a bite cycle (Figure 1C) (Hurwitz et al., 1997; Nargeot et al., 2007; 2009). This  
100 essential role played by B63 is partly mediated by a bistable membrane property, which allows  
101 the sudden switching of the neuron's resting membrane potential to a depolarized plateau that  
102 activates a high frequency burst of action potentials (Susswein et al., 2002). Consistent with this  
103 property's regenerative nature, a brief intracellular injection of depolarizing current into an  
104 otherwise silent B63 neuron can initiate a plateau potential and accompanying burst discharge,  
105 which in turn activates the contralateral B63 cell and elicits a single BMP by the buccal CPG  
106 network (Figure 1D).

107

108 **A rhythmic oscillatory drive underlies irregular BMP genesis**

109 To investigate the mechanism(s) responsible for spontaneously instigating B63's plateau  
110 potentials and resulting BMPs, we first sought evidence for an underlying triggering process in  
111 stable intracellular recordings from this neuron in still active isolated buccal ganglia (N = 26) in  
112 the absence of any electrical or chemical stimulation. Such recordings (episodes of >10 min per  
113 cell) revealed that B63's membrane potential underwent continuous depolarizing fluctuations  
114 over time (Figures 1C, 2A), many of which remained below threshold for action and plateau  
115 potential generation. Others of these low-amplitude depolarizations elicited isolated action  
116 potentials without a plateau potential, whereas the remainder were associated with the  
117 production of a plateau potential and the expression of a BMP. Consequently, B63's plateau  
118 potentials and fictive bite cycles were spontaneously generated at irregular time intervals  
119 ranging from several seconds to a minute.

120         Although B63's widely variable plateauing activity was expressed in an apparently  
121 random manner, we next asked whether its recurrence was associated with a specific temporal  
122 organization in the cell's membrane potential fluctuations. To assess this possibility, Fourier  
123 (spectral) analysis (see Material and Methods) was applied to 10 min excerpts of the 26 B63 cell  
124 recordings. As seen in the spectral density periodogram for the B63 neuron illustrated in Figure  
125 2A, the cell's spontaneous membrane potential changes decomposed into two distinct  
126 periodicities with peaks at 61 s and 144 s, respectively (Figure 2B, upper panel; Supplemental  
127 Figure 1). Moreover, a mathematical reconstruction based on these dominant periods showed  
128 that the slower waveform was mostly correlated with the largest membrane potential  
129 depolarizations that led to plateau potentials and the production of BMPs (Figure 2C). In  
130 contrast, the faster waveform was timed with virtually all membrane voltage changes, including

131 the subthreshold fluctuations and events associated with isolated action potentials or plateau  
132 potential-driven bursts.

133 The faster of the two periodicities (mean  $\pm$  CI95,  $58 \pm 5$  s) varied relatively little between  
134 different preparations, as evidenced by the sharper spectral density peak in the averaged  
135 periodogram for all 26 buccal preparations (Figure 2B, lower panel). In contrast, the broader  
136 peak of the slower rhythm (mean  $\pm$  CI95,  $146 \pm 23$  s) was indicative of the wide variability in  
137 occurrence of plateau potentials over time and between preparations. Moreover, for both  
138 rhythms, the considerable variability in their power spectral magnitudes ( $1592 \pm 650$  mV<sup>2</sup>.s,  
139  $1524 \pm 676$  mV<sup>2</sup>.s; mean  $\pm$  CI95%, respectively) was attributable to the large amplitude  
140 variations between spontaneous membrane depolarizations that succeeded or failed to trigger  
141 plateau potentials in the different preparations (see also, Supplemental Figure 1A ,B).

142 To further characterize the temporal nature of B63's faster oscillatory rhythm, spectral  
143 analysis was performed on cells (N = 14) that did not produce plateau potentials and resultant  
144 BMPs throughout 10 min recording sequences. Such non-plateauing neurons continued to  
145 express repetitive, now uniquely sub-threshold, membrane depolarizations (Figure 2D) that  
146 again were clearly rhythmic as revealed by the single dominant peak both in individual (Figure  
147 2E, top). and averaged periodograms of the 14 recorded neurons (Figure 2E, bottom).  
148 Moreover, the mean period ( $\pm$  CI95%) of this solitary rhythm ( $69 \pm 7$  s) was within a range  
149 equivalent to that of the faster oscillatory waveform found in B63 neurons that additionally  
150 expressed plateaus (cf, Figure 2E, B). Although the magnitude of the remaining subthreshold  
151 rhythm varied over time and between preparations (Figure 2E, Supplemental Figure 1B), as also

152 evidenced by waveform reconstruction (Figure 2F), it had a much smaller amplitude than the  
153 corresponding waveform in plateau-active cells.

154         Altogether, these results show that the B63's spontaneous bioelectrical behavior  
155 includes a rhythmic depolarizing signal that can remain below threshold for neuronal  
156 excitability or, in an apparently random manner, can lead to action and plateau potential  
157 production. However, despite their irregularity, the expression of plateau potentials, and  
158 resultant BMPs, is also inscribed with a periodicity, albeit considerably slower and more  
159 variable than the underlying oscillation.

160

## 161 **The voltage oscillation is endogenous to B63 and drives plateauing**

162 In principle, the low amplitude oscillation of the B63 neurons could originate extrinsically from  
163 a presynaptic source, or derive intrinsically from a rhythmogenic property inherent to the  
164 neurons itself. Although no other buccal ganglia cell has been found to provide such a synaptic  
165 drive, we distinguished between these two possibilities by recording B63 cells in isolated  
166 preparations in which chemical synapses were blocked by bath perfusion of a modified saline  
167 containing a low calcium concentration (3 mM) and 10 mM cobalt, a nonspecific calcium  
168 channel blocker.

169         The application of such 'Low Ca+Co' saline soon induced a prolonged depolarization of  
170 recorded B63 neurons (Figure 3A), then after ca. 20 min, which was necessary to fully block  
171 chemical synapses - as confirmed by the suppression of the excitatory synapse between B63  
172 and a contralateral B31 neuron (data not shown) - the membrane potential repolarized to its  
173 initial level. Significantly, these neurons thereafter continued spontaneously to express a low-

174 amplitude oscillation for > 1.5 hrs, although its magnitude gradually decreased over time (see  
175 Supplemental Figure 6A). As in normal saline conditions, the cyclic depolarizations were either  
176 sub- or supra-threshold for spike generation, or at irregular intervals, were associated with  
177 plateau potentials and high frequency bursts (Figure 3A, B; Supplemental Figure 2).

178 Spectral analysis of these persistent membrane potential oscillations during 20 min  
179 recording periods after chemical synapse blockade in 15 buccal ganglia preparations revealed  
180 that, as in ASW conditions, B63's membrane potential fluctuations decomposed into two major  
181 periodicities (Figure 3B, C and Supplemental Figure 1C). The periodograms and corresponding  
182 waveform reconstructions indicated that the slowest oscillation (mean period  $\pm$  CI95%:  $274 \pm 61$   
183 s) of large magnitude (mean spectral density  $\pm$  CI95%:  $11587 \pm 5741$  mV<sup>2</sup>.s) was mainly  
184 associated with the expression of plateau potentials. The fastest oscillation (mean period  $\pm$   
185 CI95%:  $104 \pm 12$  s) of smaller amplitude (mean spectral density  $\pm$  CI95%:  $4640 \pm 3341$  mV<sup>2</sup>.s)  
186 corresponded to rhythmic depolarizations that remained subthreshold, or were associated  
187 either with low frequency spiking or plateau driven bursts. As found in unblocked ganglia, this  
188 faster periodicity was more clearly evident when plateauing was absent: in 10 of the 15 buccal  
189 ganglia, B63 failed to produce plateaus during at least 10 min of analyzed recording excerpts,  
190 although these neurons continued to spontaneously express a rhythmic subthreshold  
191 oscillation (Figure 3D, E and Supplemental Figure 1D). Again, the mean cycle period of this  
192 solitary waveform ( $\pm$  CI95%:  $98 \pm 8$  s) was similar to that of the faster rhythm when plateau  
193 potentials also occurred (cf., Figure 3B, C).

194 Thus, although blocking chemical synapses led to variations in mean cycle periods,  
195 amplitudes and plateau durations, B63's spontaneous voltage fluctuations still expressed two

196 distinct oscillatory states, indicating that both processes occur independently of chemical  
197 synaptic inputs. Furthermore, inspection of the superimposed reconstructions of these  
198 oscillations under Low Ca+Co (Figure 3B), as in ASW (see Figure 2C), indicated that the onset of  
199 each plateau potential was invariably associated with a depolarizing phase of the faster  
200 oscillation, suggesting that the latter endogenous signal might be responsible for triggering the  
201 former.

202         This initiating process was further indicated by comparing the kinetics of B63's  
203 spontaneous voltage changes during subthreshold cycles of oscillation with those associated  
204 with plateaus. From recordings under both synaptic blockade (Figure 4A,B) or normal saline  
205 conditions (Supplemental Figure 3A), the superposition of single cycles with and without  
206 plateau potential occurrences indicated that the relatively fast rising phases of the two events  
207 shared similar trajectories. In the absence of a plateau potential, this initial depolarization could  
208 trigger large amplitude impulse firing, or when a plateau occurred, it emerged as an additional  
209 and sustained (lasting tens of seconds) depolarization of 20-30 mV that in turn elicited a high  
210 frequency burst of low amplitude action potentials. The relationship between the voltage  
211 oscillation and plateauing in both Low Ca+Co and ASW conditions was quantified by phase  
212 plane analysis, which enables visualizing the voltage trajectory of neuronal oscillatory activity  
213 independent of time. To this end, recordings from B63 were low pass filtered to remove action  
214 potentials, then membrane voltage was plotted against the first derivative  $dV/dt$ , which is  
215 proportional to the net membrane ionic current (Zhu et al., 2016). Such phase-plane plots from  
216 data excerpts of the same neurons under synaptic blockade (Figure 4C) or unblocked conditions  
217 (Supplemental Figure 3B) clearly showed a close coincidence between the early depolarizing

218 trajectories of the spontaneous oscillation whether they developed (black spirals) or not (red  
219 spirals) into a sustained plateau. Subsequently, depending on the membrane potential reached  
220 at the end of this initial phase, the level of which varied considerably from one cycle to another,  
221 the trajectories bifurcated to give rise either to the large and stereotyped voltage changes of  
222 plateau potentials, or if subthreshold, immediately spiraled back to the baseline potential.

223         Therefore, together these results support the conclusion that rather than being  
224 instigated by chemically-mediated synaptic inputs, the repeated expression of plateau  
225 potentials by the B63 neuron is a direct consequence of a spontaneous membrane voltage  
226 oscillation of irregular magnitude originating from within the cell itself.

227

## 228 **The oscillatory mechanism is not voltage-dependent**

229 A classical diagnostic feature of endogenous neuronal oscillators, the inherent rhythmogenic  
230 capability of which typically derives from voltage- and time-dependent membrane channels, is  
231 a sensitivity of cycle frequency and mode of firing to different levels of membrane polarization  
232 (Bal et al., 1988; Canavier et al., 1991; Mathieu and Roberge, 1971). We therefore tested the  
233 voltage-dependence of B63's oscillatory mechanism by manipulating the cell's membrane  
234 potential during intracellular recordings from buccal ganglia exposed to Low Ca+Co saline. As  
235 described earlier in this condition, B63 neurons continued spontaneously to generate a voltage  
236 oscillation that included both subthreshold depolarizations and less frequent plateau potentials  
237 with accompanying intense bursts of impulses (Figure 5A, left). As seen in Figure 5A (right), a  
238 continuous experimental hyperpolarization by intracellular current injection suppressed the  
239 expression of plateau potentials, but with no observable effect on the frequency of the

240 underlying oscillation. The latter remained similar to that expressed before the imposed  
241 hyperpolarization where individual depolarizing cycles were strictly time-locked with the raising  
242 phase of each plateau potential (see arrowheads in Figure 5A, left). These findings were  
243 therefore in accordance with the all-or-none, voltage-sensitivity of B63's plateau potentials that  
244 are activated by the low-amplitude voltage oscillation. They also indicated that the latter's cycle  
245 period is unaffected by a change in membrane potential either in response to experimental  
246 manipulation or during the plateau potentials themselves.

247         This voltage-insensitivity of B63's low amplitude oscillation was further established by  
248 comparing the effects of the same imposed membrane potential changes in different  
249 preparations. Using two-electrode current-clamp in 7 preparations, B63 was initially held at -70  
250 mV, a potential that was subthreshold for plateau genesis, and subsequently further  
251 hyperpolarized to -80 mV. No significant change in oscillation cycle period resulted from this  
252 hyperpolarization (Figure 5B, C;  $V = 16$ ,  $p = 0.799$ ). Similarly, in 9 preparations continuous  
253 depolarizing current injection that shifted B63's membrane potential from -70 mV to -30 mV  
254 also had no significant effect on the period of ongoing oscillation (Figure 5D, E;  $V = 28$ ,  $p =$   
255  $0.553$ ). In contrast to the cycle period, however, in the same experiments the amplitude of  
256 B63's oscillation was found to increase (Figure 5B) or decrease (Figure 5D) according to the sign  
257 of injected current. Presumably this was due to the membrane potential shifting relative to the  
258 reversal potential of the depolarizing inward currents producing the oscillation (see below).  
259 Finally, very similar observations were made from a different set of B63 neurons also recorded  
260 in unstimulated buccal ganglia but which remained under ASW (data not shown), thereby



261 confirming that the cell's voltage-independent oscillation was a spontaneous emergent  
262 property regardless of whether the buccal network remained functionally reduced or intact.

263         Altogether, these results are consistent with an expected contribution of intrinsic,  
264 voltage-dependent channels to plateau potential genesis in the B63 neuron, and confirm that  
265 they are triggered by the underlying voltage oscillation. On the other hand, however, our data  
266 show that the mechanism responsible for the oscillation itself does not rely on an activation of  
267 voltage-dependent ion channels in the neuron's membrane.

268

### 269 **Circuit-wide voltage oscillation via gap-junction coupling**

270 Although chemical synaptic interactions with other buccal network neurons are not responsible  
271 for generating B63's low-amplitude voltage oscillation, the possibility remained that it  
272 originates extrinsically and is conveyed to B63 through electrical synapses, which are  
273 widespread in buccal CPG circuitry. To assess this possibility, simultaneous intracellular  
274 recordings of B63 with at least one another electrically-coupled neuron of the buccal CPG  
275 network (see Figure 1B) were made under Low Ca+Co saline. Because the B63, B31 and B30  
276 neurons in each of the bilateral ganglia are major components of the radula protraction  
277 generator subcircuit and share strong electrical synapses (Hurwitz et al., 1997; Nargeot et al.,  
278 2007) these three cell types were chosen for paired recordings. Other protraction generator  
279 neurons electrically coupled with B63, such as B34, B65, were also occasionally recorded, while  
280 B8 radula closure motor neurons, which are connected to these neurons via chemical, but not  
281 any electrical, synapses were used as a control (Costa et al., 2020).

282 Paired recordings from the bilateral B63 neurons, which are themselves electrically  
283 coupled, revealed that the two cells express almost identical low-amplitude oscillations that  
284 occur in strict synchrony (Figure 6A). However, action and plateau potentials, whose expression  
285 presumably depends on individual cell excitability, occurred independently. Moreover, within a  
286 same ganglion, B31 and B30 neurons belonging to the protraction generator and electrically  
287 coupled with the ipsilateral B63 also expressed a voltage oscillation in time with that of the  
288 latter (Figure 6B; Supplemental Figure 4). In contrast, B8 motor neurons, which are not coupled  
289 with B63 or the other protraction generator neurons, did not express any such oscillation  
290 (Figure 6C).

291 The amplitudes and phase relationships of the low-amplitude voltage oscillations in  
292 neuronal pairs were next quantified by spectral analysis over 5 successive cycles during which  
293 no plateauing occurred. The oscillation magnitude was determined from the peak spectral  
294 density of the single dominant period in the corresponding power spectrum (see Supplemental  
295 Figure 1D). For homologous bilateral neurons, no significant difference in oscillation amplitude  
296 was found between either the B63 or B31 cell pairs (Figure 6D, left; B63/B63,  $V = 22$ ,  $p = 0.625$ ;  
297 B31/B31,  $V = 13$ ,  $p = 0.687$ ). However, comparison between heterologous neuron pairs within a  
298 same ganglion showed that the oscillation magnitude was significantly greater in B63 than in  
299 either the ipsilateral B31 or B30 cells (B63/B31,  $V = 78$ ,  $p < 0.001$ ; B63/B30,  $V = 36$ ,  $p < 0.01$ ) and  
300 predictably, in B8 motor neurons (Figure 6D, middle and right; also see 6B and Supplemental  
301 Figure 4).

302 Bivariate cross-waveform analysis of the same recordings revealed no significant phase  
303 difference in the voltage oscillations of homologous cell pairs, either between the two B63 or

304 B31 neurons, in bilateral ganglia (Figure 7A, C; B63/B63,  $V_0 = 31$ ,  $p = 0.769$ ; B31/B31,  $V_0 = 15$ ,  $p$   
305  $= 0.437$ ). Unexpectedly, however, in heterologous ipsilateral pairs, B63's oscillation was found  
306 to be significantly phase-advanced by several seconds compared to the accompanying  
307 oscillation of either the B31 or B30 neurons (Figure 7B, C; B31/B63,  $V_0 = 78$ ,  $p < 0.001$ ; B30/B63,  
308  $V_0 = 35$ ,  $p < 0.02$ ). Moreover, group pair-wise comparisons indicated that the oscillation phase  
309 was also significantly different between the different cell combinations ( $H = 20.947$ ,  $p < 0.001$ ),  
310 specifically, between homologous and heterologous pairs (B63/B63 vs B31/B63:  $q = 6.986$ ,  $p <$   
311  $0.001$ ; B63/B63 vs B30/B63:  $q = 8.263$ ,  $p < 0.001$ ; B31/B31 vs B31/B63:  $q = -5.064$ ,  $p < 0.01$ ;  
312 B31/B31 vs B30/B63:  $q = -6.407$ ,  $p < 0.005$ ). In contrast, no significant phase differences were  
313 found between either homologous or between heterologous cell pairs (B63/B63 vs B31/B31:  $q$   
314  $= 0.889$ ,  $p = 0.922$ ; B31/B63 vs B30/B63:  $q = 2.034$ ,  $p = 0.486$ ).

315         These findings thus showed that a spontaneous membrane potential oscillation is not  
316 restricted to the B63 neurons, but extends to all other neurons with which these two cells are  
317 electrically-coupled in the radula protraction generator circuit. The voltage oscillations in  
318 homologous cells in the two hemi-ganglia are synchronous and with similar amplitudes.  
319 However, within a given ganglion, each cycle of oscillation is expressed earlier in B63 and with a  
320 greater magnitude than in any of the cell's network partners. These relative timing and  
321 amplitude differences therefore support the conclusion that the voltage oscillation is not an  
322 equivalent emergent property of a network of electrically-coupled neurons, but rather,  
323 originates in the two B63 cells and then spreads, presumably via gap junctional connections  
324 with adjacent cells, throughout the remaining circuit.

325

## 326 **Involvement of cation channels and organelle signaling in B63's oscillation**

327 As reported above, an experimental depolarization of B63 decreased the amplitude of its  
328 spontaneous voltage oscillation, indicating a reversal potential for the underlying ionic currents  
329 above -30 mV (see Figure 5D), which in turn suggested the involvement of sodium and/or  
330 calcium conductances in the oscillation. To test this likelihood, we examined three groups of 6  
331 isolated buccal ganglia that were all initially bathed in Low Ca+Co saline to block chemical  
332 synapses. In a first group, the sodium channel blocker, TTX (50  $\mu$ M), was then added to the  
333 bathing solution; in a second 'sodium free' group, the ganglia were exposed to a modified  
334 Low+Ca saline in which sodium was replaced by choline, a non-permeable cation; in a third  
335 'calcium-free' group, the initial saline was replaced by a solution lacking any calcium and  
336 containing the calcium chelator EGTA (0.5 mM).

337 As evidenced by the individual cell recordings in Figure 8A-C, the voltage oscillation of  
338 the B63 neurons was reversibly abolished by exposure to each of the three salines. This  
339 suppression was quantified in the 18 recorded neurons by making a paired comparison of their  
340 peak spectral densities in 10 min data excerpts obtained before and after 10 min of modified  
341 saline application (Figure 8D). In all cases, the initial dominant oscillation was significantly  
342 diminished in each of the saline conditions (TTX:  $V = 21$ ,  $p < 0.05$ ; Sodium-free:  $V = 21$ ,  $p <$   
343  $0.05$ ; Calcium-free:  $V = 21$ ,  $p < 0.05$ ). A noticeable difference, however, was that from the  
344 instant when observable saline effects began to occur, the time course of this suppression  
345 varied considerably according to the saline condition. Whereas B63's oscillation terminated  
346 totally and abruptly in TTX-containing and Na-free salines (Figure 8A, B), with the same rate of  
347 calcium-free perfusion, the oscillation persisted after an effect first became evident, damping

348 slowly until its full suppression several minutes later (Figure 8C). This difference in oscillation  
349 longevity is further evident in the group analysis of Figure 8E, which compares the time until  
350 the oscillation ceased when measured from the onset of each modified saline's perfusion.  
351 Again, suppression took significantly longer in the Ca-free saline as compared to either the TTX-  
352 containing or Na-free conditions ( $H = 11.684$ ,  $p < 0.001$ ; Ca-free vs TTX:  $q = 4.624$ ,  $p < 0.05$  and  
353 Ca-free vs Na-free:  $q = 8.092$ ,  $p < 0.001$ ), which themselves were not significantly different ( $q = -$   
354  $3.468$ ,  $p = 0.07$ ).

355         These results are therefore consistent with sodium and calcium ions play a critical role  
356 in B63's spontaneous voltage oscillation, although their contributions appear to be  
357 fundamentally different. The rapid and full suppression of the oscillation in sodium-free or TTX-  
358 containing salines, both of which contained calcium, indicated that TTX-sensitive sodium  
359 channels are essential to producing the oscillation. By contrast, its slow decline in the absence  
360 of extracellular calcium is not consistent with a primary role of transmembrane calcium influxes  
361 in oscillation genesis *per se*. Rather, although necessary for oscillation, calcium may act in an  
362 underlying regulatory process involving the dynamics of intracellular calcium and its control by  
363 intracellular stores, and that this signal is temporarily preserved after the cation's extracellular  
364 removal as the store calcium gradually runs down until depletion.

365         The main organelles that regulate intracellular calcium concentration are the  
366 endoplasmic reticulum (ER) whose membrane carries calcium channels, the calcium-ATPase  
367 reuptake pump (SERCA) and calcium release channels (the inositol triphosphate (IP3) and  
368 ryanodine (Ry) receptors), and mitochondria that act in energy supply as well as calcium  
369 sequestration and release (Groten et al., 2013). To test the implication of ER and mitochondrial

370 calcium in B63's voltage oscillation, isolated buccal ganglia (N = 6) were bathed in Low Ca+Co  
371 saline before and after addition of 20  $\mu$ M CPA, a selective inhibitor of SERCA (see Materials and  
372 Methods). In a second group of ganglia, (N = 6), the same protocol was used, but with the  
373 addition of 20  $\mu$ M FCCP, an oxidative phosphorylation uncoupling agent that leads to calcium  
374 release from mitochondrial stores. From intracellular recordings of B63 neurons in these  
375 preparations, peak spectral density magnitudes during a 10 min excerpt before drug application  
376 - and in the absence of plateau potentials - were compared to those computed over a 10 min  
377 period that began 20 min after the start of drug perfusion.

378 Bath perfusion of CPA caused a progressive and complete, but reversible, suppression of  
379 B63's voltage oscillation in association with a slight, but consistent, gradual membrane  
380 depolarization (Figure 9A). The application of FCCP also completely, although irreversibly,  
381 suppressed the oscillation that was now accompanied by a stronger sustained depolarization of  
382 ~10-20 mV (Figure 9C). No such change in B63's voltage oscillation or baseline membrane  
383 potential resulted from perfusion of either Low Ca+Co alone or this saline containing solely the  
384 DMSO vehicle (Supplemental Figure 5). A within group analysis of peak spectral densities before  
385 vs during drug application confirmed that exposure to CPA or FCCP significantly reduced the  
386 oscillation amplitude of all the recorded B63 neurons (Figure 9B, D; CPA:  $V = 21$ ,  $p < 0.05$ ; FCCP:  
387  $V = 21$ ,  $p < 0.05$ ). The peak spectral density reduction was also significantly different between  
388 both the CPA and FCCP experimental groups and neurons exposed to DMSO alone, but not  
389 between the CPA and FCCP groups themselves ( $H = 11.415$ ,  $p < 0.01$ ; CPA vs DMSO:  $q = 7.018$ ,  $p$   
390  $< 0.001$ ; FCCP vs DMSO:  $q = 6.517$ ,  $p < 0.001$ ; CPA vs FCCP:  $q = 0.501$ ,  $p = 0.933$ ).

391           These data are therefore consistent with the hypothesis that intracellular organelles  
392 play an important role in generating the B63 neuron's low-amplitude voltage oscillation by a  
393 dynamic regulation of intracellular calcium concentration via the release of store calcium and  
394 its sequestration mediated by ATP-dependent pumps. Depletion of mitochondrial calcium  
395 (induced by FCCP) or of ER calcium by an impairment of reuptake pumps (by CPA) would be  
396 expected to block this dynamic, leading to a rise in intracellular calcium levels and a resultant  
397 tonic cell membrane depolarization, which is precisely what we observed in the experiments  
398 reported above (see Figure 9A, C).

399           To further establish the ER's involvement in B63's voltage oscillation, a final series of  
400 experiments were conducted in which we assessed the effects of blocking the membrane  
401 calcium channels of the organelles themselves. This was achieved by pressure injecting heparin  
402 (20 mg/ml), a well-known non-permeable IP3 receptor antagonist (Bezin et al., 2008), into the  
403 somata of either bilateral pairs of B63 neurons, or their two B31 network partners. After 30 min  
404 injection, simultaneous intracellular recordings were made from heterologous B63 and B31 cell  
405 pairs under Low Ca+Co saline conditions. Heparin injection into the two B31 neurons had no  
406 effect on the ongoing voltage oscillation of either a heparin-injected B31 itself or its non-  
407 injected B63 partner (Figure 10A). In contrast, the reverse experiment that consisted of  
408 injecting the IP3 receptor antagonist into the two B63 neurons caused a drastic reduction in the  
409 spontaneous oscillation, both of one of the injected B63 cells and a recorded B31 partner  
410 (Figure 10C). These findings were further supported by spectral analysis of recording excerpts  
411 from B63 cells in the two groups of preparations after bilateral B31 (N = 4) or B63 (N = 5)  
412 heparin injection. Recorded B63 neurons continued to express a distinct voltage oscillation with

413 a mean period of  $67 \pm 3.2$  s when heparin was injected into the two B31 cells (Figure 10B), but  
414 this dominant oscillation disappeared with heparin's presence in the B63 neurons (Figure 10D).  
415 Therefore, in addition to the participation of ER calcium sequestering pumps, organelle calcium  
416 release via IP3-dependent calcium channels evidently contributes to the voltage oscillation of  
417 buccal CPG network neurons. Significantly moreover, these results further demonstrated that  
418 the voltage oscillation's origin is specific to the B63 neurons, the sole necessary and sufficient  
419 elements for triggering the BMPs that drive radula food-seeking movement.  
420



## 421 Discussion

422 This study aimed to decipher the basic neuronal mechanisms underlying a central network's  
423 ability to generate the impulsive motor drive for an aspect of *Aplysia's* food-seeking behavior.  
424 Our findings indicate that this highly irregular motivated act arises from an atypical endogenous  
425 pacemaker property of a homologous pair of decision-making interneurons belonging to the  
426 animal's buccal feeding network. The cell-specific pacemaker signal does not derive from an  
427 oscillatory mechanism based on voltage-dependent ionic currents, as is usually found, but  
428 rather depends on a cyclic release/reuptake of calcium from intracellular stores acting on  
429 voltage-insensitive membrane channels. The resultant low amplitude oscillation of the decision  
430 neurons' membrane potential, which is spontaneously expressed with a regular period but a  
431 varying magnitude, is spread to gap junction-coupled network partners. Depending on the  
432 membrane potential reached during the depolarizing phase of a given oscillation cycle, a  
433 prolonged plateau and accompanying spike burst may be initiated, which in turn elicits network  
434 output for a cycle of food-seeking movement. The intracellular calcium oscillation originating in  
435 two key circuit neurons thus provides a continuous rhythmic carrier signal from which burst-  
436 generating plateau potentials necessary for behavioral action can sporadically arise.

437

### 438 Intracellular calcium oscillation as a neuronal pacemaker mechanism

439 The endogenous oscillatory capability of invertebrate and vertebrate neuronal pacemakers is  
440 mainly attributed to sets of plasma membrane ion channels whose specific functional  
441 properties allow the production of cyclic membrane depolarization/repolarization and  
442 associated impulse bursting (Adams and Benson, 1985; Brocard et al., 2013; Calabrese, 1995;

443 Chevalier et al., 2016; Golowasch et al., 2017; Harris-Warrick, 2002; Selverston, 2010). Although  
444 this pacemaker mechanism can be regulated by second-messenger cascades and cytosolic  
445 calcium released from intracellular stores, its expression relies essentially on the voltage-  
446 sensitivity of the membrane channels themselves (Butera et al., 1996; Canavier et al., 1991;  
447 Kadiri et al., 2011; Liu et al., 1998; Yu et al., 2004). Thus, depending on membrane potential  
448 levels, the cycle frequency of the endogenous voltage oscillation can be modified, thereby  
449 changing the frequency of the effector rhythm in which the pacemaker cell is involved  
450 (Canavier et al., 1991; Chevalier et al., 2016; Koshiya and Smith, 1999; Miller and Selverston,  
451 1982). Spontaneous neuronal oscillations can also be generated by voltage-independent  
452 pacemaker mechanisms involving plasma membrane ionic pumps, such as Na/K ATPase, which  
453 periodically repolarize the membrane of bursting neurons (Darbon et al., 2003; Johnson et al.,  
454 1992; Kueh et al., 2016). Such pump-driven oscillations require tonic cellular activation or  
455 disinhibition and are not blocked by extracellular calcium removal or Na channel blockers such  
456 as TTX.

457 An increasing body of evidence from studies on endocrine, muscle and non-excitabile  
458 tissues (Baker et al., 2016; Fridlyand et al., 2010; Vinogradova et al., 2005; Zhou et al., 2019),  
459 but also in early developing neurons (Gu et al., 1994), has indicated that a slow oscillatory cell  
460 signal with cycle periods of seconds to several minutes can be generated spontaneously by  
461 organelle-derived fluctuations in intracellular calcium concentration. Such a rhythmic calcium  
462 dynamic, involving notably the endoplasmic reticulum and mitochondria, may be a source of  
463 plasma membrane voltage oscillation without the participation of voltage-sensitive ion  
464 channels. Specifically, the oscillation arises from a periodic accumulation/removal of

465 cytoplasmic calcium, principally by IP<sub>3</sub> and Ry receptor-mediated calcium efflux and ATP-  
466 dependent pump-mediated influx across the store membrane, which in turn is translated into a  
467 voltage signal by an activation of calcium-sensitive channels at the plasma membrane  
468 (Fridlyand et al., 2010; Hickey et al., 2010; van Helden et al., 2000; Vinogradova et al., 2005).

469 In a corresponding and novel manner for a neuronal system, our present data indicate  
470 that an intracellular calcium wave generated by organelle calcium release and reuptake is  
471 responsible for the spontaneous low-amplitude voltage oscillation observed in B63 neurons.  
472 First, experimental manipulation of the cell's membrane potential over voltage ranges where  
473 most voltage-dependent channels would be expected to be closed had no effect on either the  
474 occurrence or frequency of this persistent oscillation. Second, at variance with a possible  
475 essential contribution of plasma membrane sodium or calcium pumps, the voltage oscillation  
476 was suppressed in TTX-containing saline and its magnitude increased, rather than decreased, as  
477 would be expected with low extracellular calcium concentrations. Third, the voltage oscillation  
478 was suppressed with pharmacological treatments that inhibit IP<sub>3</sub> receptors, block SERCA pumps  
479 involved in transporting calcium into the endoplasmic reticulum, and disrupt energy production  
480 and calcium storage by mitochondria. Finally, the slow and gradual suppression of the voltage  
481 oscillation observed during prolonged exposure to calcium-free saline was commensurate with  
482 a progressive depletion of store calcium. Presumably, the primary intracellular calcium dynamic  
483 drives plasma membrane voltage oscillation by activating calcium-sensitive and voltage-  
484 insensitive sodium or other cation channels (Hickey et al., 2010; Kadiri et al., 2011; Kramer and  
485 Zucker, 1985), without excluding the possibility that B63's membrane carries other burst-  
486 generating oscillatory properties (Costa et al., 2020; Nargeot et al., 2009; Susswein et al., 2002).

487 Indeed, in contrast to the organelle-derived oscillatory mechanism reported here, where B63  
488 was behaving spontaneously in the absence any experimental stimulation, this cell also  
489 possesses an oscillatory bursting capability that does rely on voltage-dependent ion channels  
490 (Nargeot et al, 2007; 2009; Sieling et al, 2009). However, this latter mechanism is activated only  
491 when the cell is conveyed to more depolarized levels by sensory-induced changes in excitability  
492 or in response to direct current injection. This state-dependent expression of two different  
493 burst-generating processes by the B63 neuron is therefore reminiscent of the multiple  
494 rhythmogenic ionic mechanisms reported in other oscillatory neurons, where each  
495 mechanism's participation varies according to different stimulus conditions (Harris-Warrick and  
496 Flamm, 1987; Kadiri et al., 2011; Peña et al., 2004).

497

### 498 **Variability in motor pattern emission with a periodic pacemaker mechanism**

499 Irregularity in the expression of motor activity is a fundamental feature of motivated or goal-  
500 directed exploratory behaviors, including *Aplysia's* food-seeking movements, when animals are  
501 faced with an uncertain surrounding environment. Although such motor variability is partly  
502 dictated by peripheral sensory inputs (Cullins et al., 2015; Lyttle et al., 2017; McManus et al.,  
503 2019; Pearson, 2000; Tam et al., 2020; Wimmer et al., 2015), it also depends on the functional  
504 properties of the central networks and constituent neurons producing the behavior (Sims et al.,  
505 2019). In this context, random processes such as stochastic variations in the activation of  
506 intrinsic and voltage-dependent properties of individual neurons and synaptic noise can be  
507 sources of variability in motor output expression (Carroll and Ramirez, 2013; Darshan et al.,  
508 2017; Melanson et al., 2017; Nargeot et al., 2009; Zhang et al., 2020). Moreover, modelling

509 evidence has suggested that an aperiodicity in slow cytosolic calcium dynamics can lead to  
510 irregular voltage oscillations in otherwise regularly bursting CPG neurons (Falcke et al., 2000). In  
511 contrast, our experimental data indicate that spontaneous and irregular motor pattern genesis  
512 can derive from a cell-specific pacemaker mechanism involving an intracellular calcium dynamic  
513 that itself is strictly periodic, but where randomness arises from cycle-to-cycle variations in the  
514 amplitude of the rhythmic membrane depolarizations it produces. By oscillating close to the  
515 threshold for voltage-dependent plateau potential genesis required for CPG circuit output,  
516 these low-amplitude depolarizations thereby determine the variability with which *Aplysia's*  
517 exploratory movements are expressed. Timing irregularity would be further reinforced by an  
518 interaction between the differing dynamics of the organelle-derived and voltage-dependent  
519 oscillatory mechanisms that coexist in the B63 neuron as mentioned above.

520         Magnitude alterations in cytosolic calcium fluxes and resultant plasma membrane  
521 voltage changes can arise from an interaction between different dynamic processes. Such  
522 variability could result from a direct interplay between the different intracellular calcium stores  
523 themselves (Geiger and Magoski, 2008; Groten et al., 2013; Haberichter et al., 2001; Hajnóczky  
524 et al., 1995; Wacquier et al., 2019, 2016) or from an interaction between the store-generated  
525 calcium oscillation and extracellular calcium influxes (Chay, 1996a; Falcke et al., 2000; van  
526 Helden et al., 2000). Furthermore, voltage amplitude irregularity could arise from an interplay  
527 between the individual calcium oscillations of gap junction-coupled neurons (Bindschadler and  
528 Sneyd, 2001; De Blasio et al., 2004; Liu et al., 2011). In addition to such processes, irregular  
529 magnitude fluctuations in the voltage oscillation of the B63 neurons could also partly result  
530 from plateau potential production in the different electrically-coupled neurons of the buccal

531 CPG network. Presumably, because these plateaus are generated in the soma, far from the  
532 intercellular junctions in the neuropile, they are not phase-coupled in the different network  
533 neurons, producing only weak depolarizations in post-junctional cell partners. Nevertheless,  
534 these uncoordinated depolarizations would be sufficient to participate in randomly modifying  
535 the amplitude of the ongoing voltage oscillation in the B63 neurons-

536

### 537 **Propagation of pacemaker activity amongst gap junction-connected neurons**

538 It is well known that gap junction-mediated electrical coupling promotes the synchronization of  
539 pacemaker neuron bursting in CPG networks (Leznik and Llinás, 2005; Marder, 1984; Nadim et  
540 al., 2017; Sasaki et al., 2013; Sieling et al., 2014; Soto-Treviño et al., 2005), and is similarly  
541 involved in *Aplysia's* buccal feeding circuit (Sieling et al., 2014). In non-neuronal tissues, gap  
542 junctions have also been found to co-ordinate multicellular activity by propagating calcium  
543 waves via metabolic coupling (Benninger et al., 2008; Leybaert and Sanderson, 2012; Peters et  
544 al., 2007). Due to strong intracellular buffering mechanisms, calcium itself is unlikely to play a  
545 role in such intercellular communication (Leybaert and Sanderson, 2012). Rather, calcium wave  
546 propagation through gap junctions is most likely mediated by a diffusion of IP3 and its chain  
547 activation of IP3/Ry receptors and calcium release within adjacent cells (Harootunian et al.,  
548 1991; Miyazaki et al., 1992; Takeuchi et al., 2020). In addition to transfer through gap junctions,  
549 calcium waves can be propagated by extracellular paracrine signaling involving calcium-induced  
550 ATP release and an activation of ATP-gated membrane receptors and resultant IP3 synthesis in  
551 neighboring cells (Newman and Zahs, 1997; Scemes and Giaume, 2006).

552           Several lines of evidence suggest that the calcium dynamic driving membrane potential  
553 oscillation and originating in the B63 neurons is also conveyed non-electrically to its gap  
554 junction-coupled partners in the buccal network. First, the magnitude of B63's voltage  
555 oscillation, which is presumably proportional to the intracellular calcium signal, was  
556 consistently stronger than in any other network cells, such as B30, B31 and B65, despite their  
557 similar membrane input resistances. Second, the voltage oscillation in B63 preceded that  
558 recorded in these other cells by several seconds, which is compatible with a slower propagation  
559 (~70  $\mu\text{m/s}$ ) of the underlying calcium oscillatory signal by a metabolic process rather than by  
560 direct electrical transmission of the voltage oscillation itself (Benninger et al., 2008). Third, the  
561 intracellular injection of the IP3 receptor antagonist heparin into B63, but not into B31,  
562 suppressed the voltage oscillation in both neurons, thus indicating that its origin and  
563 intercellular propagation is selectively dependent on IP3 signaling in B63. These findings also  
564 argue against the possibility that the oscillation occurring throughout the buccal CPG circuit is a  
565 network property that emerges from electrical coupling between equivalently-active neurons,  
566 but rather, further underline the crucial pacemaker role played by B63 in buccal network  
567 operation. In contrast to all other identified circuit cells, this neuron pair are the only elements  
568 necessary and sufficient for triggering buccal motor pattern expression and resultant food-  
569 seeking movement (Hurwitz et al., 1997; Nargeot et al., 2009). Moreover, this essential leading  
570 role persists after appetitive operant conditioning-when the network's junctional conductances  
571 are strengthened and the transition from irregular to rhythmic BMP genesis occurs (Nargeot et  
572 al., 2009; Nargeot and Simmers, 2012).

573           In conclusion, without excluding the involvement of other cellular mechanisms, our  
574 study shows that in the absence of extrinsic stimulation, the CPG network output for *Aplysia's*  
575 food-seeking behavior can arise from a combination of spontaneous intracellular calcium  
576 dynamics in two decision neurons and IP3-dependent circuit-wide metabolic propagation.  
577 Although autonomously bursting neurons may employ intracellular stores as a source of  
578 calcium (Kadiri et al., 2011; Levy, 1992; Scholz et al., 1988), in all cases, the mobilization of store  
579 calcium, by interacting with calcium-activated membrane channels, is thought to regulate the  
580 voltage dynamics of ongoing bursting behavior. However, other than theoretical evidence  
581 (Chay, 1996a, 1996b), a spontaneous and rhythmic organelle-derived calcium dynamic serving  
582 as a primary oscillator mechanism for actually driving neuronal bursting has not been previously  
583 reported. Moreover, we believe that our findings provide the first example of the involvement  
584 of such a rhythmogenic mechanism in the highly variable expression of a motivated behavior.  
585 Experiments are now required to determine whether B63's intracellular calcium handling is  
586 regulated by associative learning when hungry *Aplysia* switches its impulsive and irregular food-  
587 seeking movements to a rhythmic compulsive-like act as found in more complex organisms.  
588



589

## 590 **Materials and Methods**

### 591 **Animals**

592 Adult *Aplysia californica* (purchased from the University of Florida, Florida), and *A. fasciata*  
593 (caught locally in the Bassin d'Arcachon, France) were used in the experiments. Consistent with  
594 previous studies (Katzoff et al., 2002; Sieling et al., 2014), no inter-species differences in either  
595 behavioral or neuronal characteristics were found. Animals were housed in tanks containing  
596 fresh aerated sea water (~15°C) and were fed *ad libitum* with seaweed (*Ulva lactuca* obtained  
597 from the Station Biologique at Roscoff, France).

598

### 599 **Isolated nervous preparation**

600 Animals were anesthetized with 50 ml isotonic MgCl<sub>2</sub> solution (in mM: 360 MgCl<sub>2</sub>, 10 HEPES  
601 adjusted to pH 7.5) injected into the hemocoel. The bilateral buccal ganglia and their peripheral  
602 nerves were dissected from the animal and pinned out in a Sylgard-lined Petri dish containing a  
603 standard artificial sea water solution (ASW, in mM: 450 NaCl, 10 KCl, 30 MgCl<sub>2</sub>, 20 MgSO<sub>4</sub>, 10  
604 CaCl<sub>2</sub>, 10 HEPES with the pH adjusted to 7.5). The ganglia were desheathed to expose the  
605 neuronal somata and the preparations were continuously superfused with ASW at 15°C.

606

### 607 ***In vitro* electrophysiology**

608 Spontaneous buccal motor output patterns were monitored by wire electrodes placed against  
609 appropriate motor nerves and insulated from the bath with petroleum jelly (Vaseline). The I2

610 (I2 n.), 2,1 (n. 2,1) and radular (R n.) nerves were used to monitor radular protraction,  
611 retraction and closure activity, respectively (Nargeot et al., 1997). The motor pattern-initiating  
612 interneurons B63 and B30, and the motoneurons B31/B32 (protraction) and B8 (closure) were  
613 recorded and identified according to previously reported criteria (Church and Lloyd, 1991;  
614 Hurwitz et al., 1997; Jelescu et al., 2013; Jing et al., 2004; Susswein and Byrne, 1988). These  
615 neurons were impaled with sharp glass microelectrodes with a tip resistance of 20-30 M $\Omega$  and  
616 filled with a KCH<sub>3</sub>CO<sub>2</sub> solution (2 M). In the two-electrode current-clamp condition, two  
617 intrasomatic electrodes were inserted in each neuron, with one electrode used for current  
618 injection and the other for membrane potential recording via an Axoclamp-2B amplifier  
619 (Molecular Devices, Palo Alto, CA). Intracellular and extracellular signals were digitalized and  
620 acquired at 5 kHz with a CED interface (CED 1401, Cambridge Electronic Design, UK) with Spike  
621 2 software (Cambridge Electronic Design, UK).

622

### 623 **Modified saline and pharmacology**

624 Blockade of chemical synaptic transmission was performed with bath perfusion of a modified  
625 ASW that contained cobalt, a calcium channel blocker (CoCl<sub>2</sub>, 10 mM), and a lowered  
626 concentration of calcium (CaCl<sub>2</sub>, 3 mM) (Alkon and Grossman, 1978). Neither this decrease in  
627 Ca<sup>2+</sup> concentration alone, nor the presence of the CoCl<sub>2</sub> alone was found sufficient to block the  
628 chemical synapses. This 'Low Ca+Co' saline contained (in mM): 446 NaCl, 10 KCl, 30 MgCl<sub>2</sub>, 20  
629 MgSO<sub>4</sub>, 3 CaCl<sub>2</sub>, 10 CoCl<sub>2</sub>, 10 HEPES with the NaCl concentration adjusted to the same  
630 osmolarity as ASW. Synaptic blockade was indicated by the suppression of chemical excitatory  
631 post-synaptic potentials produced by B63 in the contralateral B31 neuron (Hurwitz et al., 1997).

632 Data reported here under the Low Ca+Co saline condition were acquired after 20 min perfusion  
633 to allow for a complete synaptic blockade and the recovery of recorded neurons' resting  
634 membrane potential to at least -50 mV.

635 The sodium- or calcium-free solutions used in several experiments derived from  
636 modifications to the Low Ca+Co saline. In the Na<sup>+</sup>-free saline, sodium was totally substituted by  
637 choline (in mM: 446 C<sub>5</sub>H<sub>14</sub>NO.Cl, 10 KCl, 30 MgCl<sub>2</sub>, 20 MgSO<sub>4</sub>, 3 CaCl<sub>2</sub>, 10 CoCl<sub>2</sub>, 10 HEPES). In  
638 the Ca<sup>2+</sup>-free saline, no calcium was present and a calcium chelator, Ethylene glycol-bis (2-  
639 aminoethylether)-N, N, N', N'-tetraacetic acid (EGTA) was added to the solution (in mM: 450  
640 NaCl, 10 KCl, 30 MgCl<sub>2</sub>, 20 MgSO<sub>4</sub>, 10 CoCl<sub>2</sub>, 10 HEPES, 0.5 EGTA) (Hickey et al., 2010). The pH  
641 for all solutions was adjusted to 7.5.

642 Tetrodotoxin (TTX, Tocris), a blocker of sodium channels in plasma membranes, was  
643 diluted to 50 μM in distilled water from a 0.5 mM stock solution (Hurwitz et al., 2008).  
644 Cyclopiazonic acid (CPA, Merck-Sigma-Aldrich), a blocker of the sarco/endoplasmic reticulum  
645 Ca<sup>2+</sup>-ATPase pump (SERCA) and Carbonyl cyanide 4- (trifluoromethoxy) phenylhydrazone (FCCP,  
646 Merck-Sigma-Aldrich), a protonophoric uncoupler of mitochondrial oxidative phosphorylation  
647 that depolarizes the mitochondrial membrane and leads to the organelle's release of calcium,  
648 were diluted to 20 μM in Low Ca+Co saline from stock solutions that were prepared in dimethyl  
649 sulfoxide (DMSO) (Benz and McLaughlin, 1983; Geiger and Magoski, 2008; Hickey et al., 2010).  
650 The maximum concentration of DMSO in the final volume reached 0.05%, which in control and  
651 previously reported studies did not alter the electrophysiological properties of neurons, the  
652 strength of electrical synapses, or intracellular calcium concentrations (Beekharry et al., 2018).

653 Heparin sodium salt solution (Tocris) at 20 mg/ml, an inositol tri-phosphate (IP3)  
654 receptor antagonist (Bezin et al., 2008), was pressure injected via an glass micropipette (10  
655 M $\Omega$ ) inserted into the cell bodies of the bilateral B63 or B31 neurons. Pressure was generated  
656 by a Picospritzer2 with 20 pulses of 15 PSI, 150 ms, at around 0.03 Hz. Following injection,  
657 which was performed during bath perfusion of ASW, one of the 2 heparin-containing electrodes  
658 was removed and replaced by a 2 M KAcetate microelectrode for intracellular recording that  
659 started 30 min after the heparin injection. In several of these experiments (2/5 with B63 and  
660 2/4 with B31), 2 mg/ml of fast green (Merck-Sigma-Aldrich) was added to the heparin solution  
661 to verify effectiveness of the injection. No difference was found between the intracellular  
662 recordings of cells injected with or without fast green.

663

#### 664 **Intracellular recording analysis**

665 Variations in the membrane potential of recorded neurons were analyzed in a cycle  
666 frequency/period bandwidth of 0.00195 to 0.125 Hz (i.e., periods of 512 s to 8 s) by Fast Fourier  
667 Transform (FFT) analysis using R language and environment (R Core Team, 2019) for statistical  
668 computing. The membrane voltage recordings were initially smoothed using the Spike 2  
669 'Smooth' filter with a time constant of 500 ms to suppress signals of frequencies higher than  
670 those within the desired band-width and down-sampled at 1 Hz in order to decrease  
671 computation time. The resulting power spectral density periodograms were then used to  
672 identify oscillation periods of peak magnitude (Supplemental Figure 1). The periodograms were  
673 computed from the FFT frequency spectrograms by converting the frequency band (in Hz) to its  
674 reciprocal, period (in secs), to facilitate discerning the temporal correspondence between these

675 plots and the relatively slow (from secs to mins ) spontaneous membrane voltage fluctuations  
676 occurring in the raw recordings. Reconstruction of the sinusoidal waveforms corresponding to  
677 dominant periods and the phase-relationships between signals from neuron pairs were  
678 computed from Wavelet decomposition using the R-CRAN “WaveletComp” package for the  
679 built-in analysis of univariate and bivariate time series (Roesch and Schmidbauer, 2018).  
680 Averaged periodograms represent means +/- 95% confidence interval (CI95%) of the individual  
681 periodograms. Phase-plane plots of membrane potential were computed by using custom-  
682 written R script for intracellular recordings that were smoothed with a time constant of 500 ms  
683 and down-sampled at 10 Hz.

684

## 685 **Statistical analyses**

686 Animals were randomly assigned to each experimental group, and although estimations of  
687 sample sizes were not computed initially, an attempt was made to minimize the number of  
688 animals sacrificed. One-sample comparisons to a theoretical value (0 sec.) were performed  
689 using the two-tailed one-sample Wilcoxon signed rank test ( $V_0$  statistic). Within-group  
690 comparisons of two datasets were carried out using the two-tailed Wilcoxon signed rank test ( $V$   
691 statistic). Between-group comparisons for more than two independent groups were conducted  
692 using the two-tailed Kruskal-Wallis test ( $H$  statistic) followed by the *post-hoc* multiple  
693 comparisons Conover's test ( $q$  statistic). The application of these non-parametric statistical  
694 tests to small datasets was justified by the failure to satisfy assumptions of normality and  
695 homoscedasticity with high statistical powers. Statistical analyses were performed using the R-  
696 CRAN “Base” and “PMCMRplus” packages (Pohlert, 2019). Similar results were obtained with

697 analyses performed both with and without outlier values, and all statistics reported in the text  
698 and figures were computed without data removal. Differences were considered significant for  $p$   
699  $< 0.05$ . Box-plot illustrations represent median values (horizontal lines) along with the first and  
700 third quartiles (boxes) in datasets.

701

## 702 **Acknowledgements:**

703 This research was supported by grants ANImE ANR-13-BV5-0014-01 (ANImE, R.N.), ANR-10-  
704 Idex-03-02 (A.B.), and a doctoral studentship (L.P.) from the French ‘Ministère de  
705 l’Enseignement Supérieur et de la Recherche’.

706

## 707 **Competing interests:**

708 The authors declare that no competing interests exist.

709

## 710 **References**

- 711 Adams WB, Benson JA. 1985. The generation and modulation of endogenous rhythmicity in the  
712 aplysia bursting pacemaker neurone R15. *Progress in Biophysics and Molecular Biology*  
713 **46**:1–49. doi:10.1016/0079-6107(85)90011-2
- 714 Alkon DL, Grossman Y. 1978. Evidence for nonsynaptic neuronal interaction. *J Neurophysiol*  
715 **41**:640–653. doi:10.1152/jn.1978.41.3.640
- 716 Baker SA, Drumm BT, Saur D, Hennig GW, Ward SM, Sanders KM. 2016. Spontaneous Ca(2+)  
717 transients in interstitial cells of Cajal located within the deep muscular plexus of the  
718 murine small intestine. *J Physiol* **594**:3317–3338. doi:10.1113/JP271699
- 719 Bal T, Nagy F, Moulins M. 1988. The pyloric central pattern generator in Crustacea: a set of  
720 conditional neuronal oscillators. *Journal of Comparative Physiology A* **163**:715–727.  
721 doi:10.1007/BF00604049
- 722 Balleine BW. 2019. The Meaning of Behavior: Discriminating Reflex and Volition in the Brain.  
723 *Neuron* **104**:47–62. doi:10.1016/j.neuron.2019.09.024
- 724 Balleine BW, Dezfouli A. 2019. Hierarchical Action Control: Adaptive Collaboration Between  
725 Actions and Habits. *Front Psychol* **10**:2735. doi:10.3389/fpsyg.2019.02735

- 726 Beekharry CC, Gu Y, Magoski NS. 2018. Protein kinase C enhances electrical synaptic  
727 transmission by acting on junctional and postsynaptic Ca<sup>2+</sup> Currents. *J Neurosci*  
728 **38**:2796–2808. doi:10.1523/JNEUROSCI.2619-17.2018
- 729 Benninger RKP, Zhang M, Head WS, Satin LS, Piston DW. 2008. Gap junction coupling and  
730 calcium waves in the pancreatic islet. *Biophys J* **95**:5048–5061.  
731 doi:10.1529/biophysj.108.140863
- 732 Benz R, McLaughlin S. 1983. The molecular mechanism of action of the proton ionophore  
733 FCCP (carbonylcyanide p-trifluoromethoxyphenylhydrazone). *Biophys J* **41**:381–398.  
734 doi:10.1016/S0006-3495(83)84449-X
- 735 Berridge KC. 2019. Affective valence in the brain: modules or modes? *Nat Rev Neurosci*  
736 **20**:225–234. doi:10.1038/s41583-019-0122-8
- 737 Berridge KC. 2004. Motivation concepts in behavioral neuroscience. *Physiol Behav* **81**:179–209.  
738 doi:10.1016/j.physbeh.2004.02.004
- 739 Bezin S, Charpentier G, Lee HC, Baux G, Fossier P, Cancela J-M. 2008. Regulation of nuclear  
740 Ca<sup>2+</sup> signaling by translocation of the Ca<sup>2+</sup> messenger synthesizing enzyme ADP-  
741 ribosyl cyclase during neuronal depolarization. *J Biol Chem* **283**:27859–27870.  
742 doi:10.1074/jbc.M804701200
- 743 Bindschadler M, Sneyd J. 2001. A bifurcation analysis of two coupled calcium oscillators. *Chaos*  
744 **11**:237–246. doi:10.1063/1.1342161
- 745 Brembs B, Lorenzetti FD, Reyes FD, Baxter DA, Byrne JH. 2002. Operant reward learning in  
746 *Aplysia*: neuronal correlates and mechanisms. *Science* **296**:1706–1709.  
747 doi:10.1126/science.1069434
- 748 Brocard F, Shevtsova NA, Bouhadfane M, Tazerart S, Heinemann U, Rybak IA, Vinay L. 2013.  
749 Activity-dependent changes in extracellular Ca<sup>2+</sup> and K<sup>+</sup> reveal pacemakers in the spinal  
750 locomotor-related network. *Neuron* **77**:1047–1054. doi:10.1016/j.neuron.2013.01.026
- 751 Butera RJ, Clark JW, Byrne JH. 1996. Dissection and reduction of a modeled bursting neuron. *J*  
752 *Comput Neurosci* **3**:199–223. doi:10.1007/BF00161132
- 753 Calabrese RL. 1995. Oscillation in motor pattern-generating networks. *Curr Opin Neurobiol*  
754 **5**:816–823. doi:10.1016/0959-4388(95)80111-1
- 755 Canavier CC, Clark JW, Byrne JH. 1991. Simulation of the bursting activity of neuron R15 in  
756 *Aplysia*: role of ionic currents, calcium balance, and modulatory transmitters. *J*  
757 *Neurophysiol* **66**:2107–2124. doi:10.1152/jn.1991.66.6.2107
- 758 Carroll MS, Ramirez J-M. 2013. Cycle-by-cycle assembly of respiratory network activity is  
759 dynamic and stochastic. *J Neurophysiol* **109**:296–305. doi:10.1152/jn.00830.2011
- 760 Chay TR. 1996a. Electrical bursting and luminal calcium oscillation in excitable cell models.  
761 *Biol Cybern* **75**:419–431. doi:10.1007/s004220050307
- 762 Chay TR. 1996b. Modeling slowly bursting neurons via calcium store and voltage-independent  
763 calcium current. *Neural Comput* **8**:951–978. doi:10.1162/neco.1996.8.5.951
- 764 Chevalier M, Toporikova N, Simmers J, Thoby-Brisson M. 2016. Development of pacemaker  
765 properties and rhythmogenic mechanisms in the mouse embryonic respiratory network.  
766 *Elife* **5**. doi:10.7554/eLife.16125
- 767 Church PJ, Lloyd PE. 1991. Expression of diverse neuropeptide cotransmitters by identified  
768 motor neurons in *Aplysia*. *J Neurosci* **11**:618–625.
- 769 Costa RM, Baxter DA, Byrne JH. 2020. Computational model of the distributed representation  
770 of operant reward memory: combinatoric engagement of intrinsic and synaptic plasticity  
771 mechanisms. *Learn Mem* **27**:236–249. doi:10.1101/lm.051367.120



- 772 Cullins MJ, Gill JP, McManus JM, Lu H, Shaw KM, Chiel HJ. 2015. Sensory Feedback Reduces  
773 Individuality by Increasing Variability within Subjects. *Curr Biol* **25**:2672–2676.  
774 doi:10.1016/j.cub.2015.08.044
- 775 Darbon P, Tschertter A, Yvon C, Streit J. 2003. Role of the electrogenic Na/K pump in  
776 disinhibition-induced bursting in cultured spinal networks. *J Neurophysiol* **90**:3119–  
777 3129. doi:10.1152/jn.00579.2003
- 778 Darshan R, Wood WE, Peters S, Leblois A, Hansel D. 2017. A canonical neural mechanism for  
779 behavioral variability. *Nat Commun* **8**:15415. doi:10.1038/ncomms15415
- 780 De Blasio BF, Iversen J-G, Røttingen J-A. 2004. Intercellular calcium signalling in cultured  
781 renal epithelia: a theoretical study of synchronization mode and pacemaker activity. *Eur*  
782 *Biophys J* **33**:657–670. doi:10.1007/s00249-004-0409-0
- 783 Dickinson A, Balleine B. 1994. Motivational control of goal-directed action. *Animal Learning &*  
784 *Behavior* **22**:1–18.
- 785 Everitt BJ, Robbins TW. 2016. Drug Addiction: Updating Actions to Habits to Compulsions Ten  
786 Years On. *Annu Rev Psychol* **67**:23–50. doi:10.1146/annurev-psych-122414-033457
- 787 Everitt BJ, Robbins TW. 2005. Neural systems of reinforcement for drug addiction: from actions  
788 to habits to compulsion. *Nat Neurosci* **8**:1481–1489. doi:10.1038/nn1579
- 789 Falcke M, Huerta R, Rabinovich MI, Abarbanel HD, Elson RC, Selverston AI. 2000. Modeling  
790 observed chaotic oscillations in bursting neurons: the role of calcium dynamics and IP3.  
791 *Biol Cybern* **82**:517–527. doi:10.1007/s004220050604
- 792 Fridlyand LE, Tamarina N, Philipson LH. 2010. Bursting and calcium oscillations in pancreatic  
793 beta-cells: specific pacemakers for specific mechanisms. *Am J Physiol Endocrinol Metab*  
794 **299**:E517–532. doi:10.1152/ajpendo.00177.2010
- 795 Fujimoto A, Hori Y, Nagai Y, Kikuchi E, Oyama K, Suhara T, Minamimoto T. 2019. Signaling  
796 Incentive and Drive in the Primate Ventral Pallidum for Motivational Control of Goal-  
797 Directed Action. *J Neurosci* **39**:1793–1804. doi:10.1523/JNEUROSCI.2399-18.2018
- 798 Geiger JE, Magoski NS. 2008. Ca<sup>2+</sup>-induced Ca<sup>2+</sup> release in Aplysia bag cell neurons requires  
799 interaction between mitochondrial and endoplasmic reticulum stores. *J Neurophysiol*  
800 **100**:24–37. doi:10.1152/jn.90356.2008
- 801 Golowasch J, Bose A, Guan Y, Salloum D, Roeser A, Nadim F. 2017. A balance of outward and  
802 linear inward ionic currents is required for generation of slow-wave oscillations. *J*  
803 *Neurophysiol* **118**:1092–1104. doi:10.1152/jn.00240.2017
- 804 Grillner S, El Manira A. 2020. Current Principles of Motor Control, with Special Reference to  
805 Vertebrate Locomotion. *Physiol Rev* **100**:271–320. doi:10.1152/physrev.00015.2019
- 806 Groten CJ, Rebane JT, Blohm G, Magoski NS. 2013. Separate Ca<sup>2+</sup> sources are buffered by  
807 distinct Ca<sup>2+</sup> handling systems in aplysia neuroendocrine cells. *J Neurosci* **33**:6476–  
808 6491. doi:10.1523/JNEUROSCI.6384-11.2013
- 809 Gu X, Olson EC, Spitzer NC. 1994. Spontaneous neuronal calcium spikes and waves during  
810 early differentiation. *J Neurosci* **14**:6325–6335. doi:10.1523/JNEUROSCI.14-11-  
811 06325.1994
- 812 Haberichter T, Marhl M, Heinrich R. 2001. Birhythmicity, trirhythmicity and chaos in bursting  
813 calcium oscillations. *Biophys Chem* **90**:17–30. doi:10.1016/s0301-4622(01)00127-2
- 814 Hajnóczky G, Robb-Gaspers LD, Seitz MB, Thomas AP. 1995. Decoding of cytosolic calcium  
815 oscillations in the mitochondria. *Cell* **82**:415–424. doi:10.1016/0092-8674(95)90430-1



- 816 Harootunian AT, Kao JP, Paranjape S, Tsien RY. 1991. Generation of calcium oscillations in  
817 fibroblasts by positive feedback between calcium and IP<sub>3</sub>. *Science* **251**:75–78.  
818 doi:10.1126/science.1986413
- 819 Harris-Warrick RM. 2002. Voltage-sensitive ion channels in rhythmic motor systems. *Curr Opin*  
820 *Neurobiol* **12**:646–651. doi:10.1016/s0959-4388(02)00377-x
- 821 Harris-Warrick RM, Flamm RE. 1987. Multiple mechanisms of bursting in a conditional  
822 bursting neuron. *J Neurosci* **7**:2113–2128.
- 823 Hickey CM, Geiger JE, Groten CJ, Magoski NS. 2010. Mitochondrial Ca<sup>2+</sup> activates a cation  
824 current in Aplysia bag cell neurons. *J Neurophysiol* **103**:1543–1556.  
825 doi:10.1152/jn.01121.2009
- 826 Hurwitz I, Kupfermann I, Susswein AJ. 1997. Different roles of neurons B63 and B34 that are  
827 active during the protraction phase of buccal motor programs in Aplysia californica. *J*  
828 *Neurophysiol* **78**:1305–1319. doi:10.1152/jn.1997.78.3.1305
- 829 Hurwitz I, Ophir A, Korngreen A, Koester J, Susswein AJ. 2008. Currents contributing to  
830 decision making in neurons B31/B32 of Aplysia. *J Neurophysiol* **99**:814–830.  
831 doi:10.1152/jn.00972.2007
- 832 Jelescu IO, Nargeot R, Le Bihan D, Ciobanu L. 2013. Highlighting manganese dynamics in the  
833 nervous system of Aplysia californica using MEMRI at ultra-high field. *Neuroimage*  
834 **76**:264–271. doi:10.1016/j.neuroimage.2013.03.022
- 835 Jing J, Cropper EC, Hurwitz I, Weiss KR. 2004. The construction of movement with behavior-  
836 specific and behavior-independent modules. *J Neurosci* **24**:6315–6325.  
837 doi:10.1523/JNEUROSCI.0965-04.2004
- 838 Johnson SW, Seutin V, North RA. 1992. Burst firing in dopamine neurons induced by N-methyl-  
839 D-aspartate: role of electrogenic sodium pump. *Science* **258**:665–667.  
840 doi:10.1126/science.1329209
- 841 Kadiri LR, Kwan AC, Webb WW, Harris-Warrick RM. 2011. Dopamine-induced oscillations of  
842 the pyloric pacemaker neuron rely on release of calcium from intracellular stores. *J*  
843 *Neurophysiol* **106**:1288–1298. doi:10.1152/jn.00456.2011
- 844 Katzoff A, Ben-Gedalya T, Susswein AJ. 2002. Nitric oxide is necessary for multiple memory  
845 processes after learning that a food is inedible in Aplysia. *J Neurosci* **22**:9581–9594.
- 846 Koshiya N, Smith JC. 1999. Neuronal pacemaker for breathing visualized in vitro. *Nature*  
847 **400**:360–363. doi:10.1038/22540
- 848 Kramer RH, Zucker RS. 1985. Calcium-dependent inward current in Aplysia bursting pace-  
849 maker neurones. *J Physiol* **362**:107–130. doi:10.1113/jphysiol.1985.sp015666
- 850 Kueh D, Barnett WH, Cymbalyuk GS, Calabrese RL. 2016. Na<sup>(+)</sup>/K<sup>(+)</sup> pump interacts with the  
851 h-current to control bursting activity in central pattern generator neurons of leeches. *Elife*  
852 **5**. doi:10.7554/eLife.19322
- 853 Kupfermann I. 1974. Feeding behavior in Aplysia: a simple system for the study of motivation.  
854 *Behav Biol* **10**:1–26. doi:10.1016/s0091-6773(74)91644-7
- 855 Levy S. 1992. Effect of intracellular injection of inositol trisphosphate on cytosolic calcium and  
856 membrane currents in Aplysia neurons. *J Neurosci* **12**:2120–2129.  
857 doi:10.1523/JNEUROSCI.12-06-02120.1992
- 858 Leybaert L, Sanderson MJ. 2012. Intercellular Ca<sup>(2+)</sup> waves: mechanisms and function. *Physiol*  
859 *Rev* **92**:1359–1392. doi:10.1152/physrev.00029.2011
- 860 Leznik E, Llinás R. 2005. Role of gap junctions in synchronized neuronal oscillations in the  
861 inferior olive. *J Neurophysiol* **94**:2447–2456. doi:10.1152/jn.00353.2005

- 862 Liu P, Chen B, Wang Z-W. 2011. Gap junctions synchronize action potentials and Ca<sup>2+</sup>  
863 transients in *Caenorhabditis elegans* body wall muscle. *J Biol Chem* **286**:44285–44293.  
864 doi:10.1074/jbc.M111.292078
- 865 Liu Z, Golowasch J, Marder E, Abbott LF. 1998. A model neuron with activity-dependent  
866 conductances regulated by multiple calcium sensors. *J Neurosci* **18**:2309–2320.
- 867 Lyttle DN, Gill JP, Shaw KM, Thomas PJ, Chiel HJ. 2017. Robustness, flexibility, and  
868 sensitivity in a multifunctional motor control model. *Biol Cybern* **111**:25–47.  
869 doi:10.1007/s00422-016-0704-8
- 870 Marder E. 1984. Roles for electrical coupling in neural circuits as revealed by selective neuronal  
871 deletions. *J Exp Biol* **112**:147–167.
- 872 Marder E, Goeritz ML, Otopalik AG. 2015. Robust circuit rhythms in small circuits arise from  
873 variable circuit components and mechanisms. *Curr Opin Neurobiol* **31**:156–163.  
874 doi:10.1016/j.conb.2014.10.012
- 875 Mathieu PA, Roberge FA. 1971. Characteristics of pacemaker oscillations in *Aplysia* neurons.  
876 *Can J Physiol Pharmacol* **49**:787–795. doi:10.1139/y71-108
- 877 McManus JM, Chiel HJ, Susswein AJ. 2019. Successful and unsuccessful attempts to swallow in  
878 a reduced *Aplysia* preparation regulate feeding responses and produce memory at  
879 different neural sites. *Learn Mem* **26**:151–165. doi:10.1101/lm.048983.118
- 880 Melanson A, Mejias JF, Jun JJ, Maler L, Longtin A. 2017. Nonstationary Stochastic Dynamics  
881 Underlie Spontaneous Transitions between Active and Inactive Behavioral States. *eNeuro*  
882 **4**. doi:10.1523/ENEURO.0355-16.2017
- 883 Miller JP, Selverston AI. 1982. Mechanisms underlying pattern generation in lobster  
884 stomatogastric ganglion as determined by selective inactivation of identified neurons. II.  
885 Oscillatory properties of pyloric neurons. *J Neurophysiol* **48**:1378–1391.  
886 doi:10.1152/jn.1982.48.6.1378
- 887 Miyazaki S, Yuzaki M, Nakada K, Shirakawa H, Nakanishi S, Nakade S, Mikoshiba K. 1992.  
888 Block of Ca<sup>2+</sup> wave and Ca<sup>2+</sup> oscillation by antibody to the inositol 1,4,5-trisphosphate  
889 receptor in fertilized hamster eggs. *Science* **257**:251–255. doi:10.1126/science.1321497
- 890 Nadim F, Li X, Gray M, Golowasch J. 2017. Chapter 4 - The Role of Electrical Coupling in  
891 Rhythm Generation in Small Networks In: Jing J, editor. *Network Functions and*  
892 *Plasticity*. Academic Press. pp. 51–78. doi:10.1016/B978-0-12-803471-2.00004-7
- 893 Nargeot R, Baxter DA, Byrne JH. 1997. Contingent-dependent enhancement of rhythmic motor  
894 patterns: an in vitro analog of operant conditioning. *J Neurosci* **17**:8093–8105.
- 895 Nargeot R, Le Bon-Jego M, Simmers J. 2009. Cellular and network mechanisms of operant  
896 learning-induced compulsive behavior in *Aplysia*. *Curr Biol* **19**:975–984.  
897 doi:10.1016/j.cub.2009.05.030
- 898 Nargeot R, Petriassans C, Simmers J. 2007. Behavioral and in vitro correlates of compulsive-like  
899 food seeking induced by operant conditioning in *Aplysia*. *J Neurosci* **27**:8059–8070.  
900 doi:10.1523/JNEUROSCI.1950-07.2007
- 901 Nargeot R, Simmers J. 2012. Functional organization and adaptability of a decision-making  
902 network in *aplysia*. *Front Neurosci* **6**:113. doi:10.3389/fnins.2012.00113
- 903 Newman EA, Zahs KR. 1997. Calcium waves in retinal glial cells. *Science* **275**:844–847.  
904 doi:10.1126/science.275.5301.844
- 905 Pearson KG. 2000. Neural adaptation in the generation of rhythmic behavior. *Annu Rev Physiol*  
906 **62**:723–753. doi:10.1146/annurev.physiol.62.1.723

- 907 Peña F, Parkis MA, Tryba AK, Ramirez J-M. 2004. Differential Contribution of Pacemaker  
908 Properties to the Generation of Respiratory Rhythms during Normoxia and Hypoxia.  
909 *Neuron* **43**:105–117. doi:10.1016/j.neuron.2004.06.023
- 910 Peters MA, Teramoto T, White JQ, Iwasaki K, Jorgensen EM. 2007. A calcium wave mediated  
911 by gap junctions coordinates a rhythmic behavior in *C. elegans*. *Curr Biol* **17**:1601–1608.  
912 doi:10.1016/j.cub.2007.08.031
- 913 Pohlert T. 2019. PMCMRplus: Calculate Pairwise Multiple Comparisons of Mean Rank Sums  
914 Extended.
- 915 R Core Team. 2019. R: a language and environment for statistical computing. Vienne, Austria.
- 916 Roesch A, Schmidbauer H. 2018. WaveletComp: Computational Wavelet Analysis.
- 917 Sasaki K, Cropper EC, Weiss KR, Jing J. 2013. Functional differentiation of a population of  
918 electrically coupled heterogeneous elements in a microcircuit. *J Neurosci* **33**:93–105.  
919 doi:10.1523/JNEUROSCI.3841-12.2013
- 920 Scemes E, Giaume C. 2006. Astrocyte calcium waves: what they are and what they do. *Glia*  
921 **54**:716–725. doi:10.1002/glia.20374
- 922 Scholz KP, Cleary LJ, Byrne JH. 1988. Inositol 1,4,5-trisphosphate alters bursting pacemaker  
923 activity in *Aplysia* neurons: voltage-clamp analysis of effects on calcium currents.  
924 *Journal of Neurophysiology* **60**:86–104. doi:10.1152/jn.1988.60.1.86
- 925 Selverston AI. 2010. Invertebrate central pattern generator circuits. *Philos Trans R Soc Lond B*  
926 *Biol Sci* **365**:2329–2345. doi:10.1098/rstb.2009.0270
- 927 Sieling F, Bédécarrats A, Simmers J, Prinz AA, Nargeot R. 2014. Differential roles of  
928 nonsynaptic and synaptic plasticity in operant reward learning-induced compulsive  
929 behavior. *Curr Biol* **24**:941–950. doi:10.1016/j.cub.2014.03.004
- 930 Sims DW, Humphries NE, Hu N, Medan V, Berni J. 2019. Optimal searching behaviour  
931 generated intrinsically by the central pattern generator for locomotion. *Elife* **8**.  
932 doi:10.7554/eLife.50316
- 933 Soto-Treviño C, Rabbah P, Marder E, Nadim F. 2005. Computational model of electrically  
934 coupled, intrinsically distinct pacemaker neurons. *J Neurophysiol* **94**:590–604.  
935 doi:10.1152/jn.00013.2005
- 936 Steuer I, Guertin PA. 2019. Central pattern generators in the brainstem and spinal cord: an  
937 overview of basic principles, similarities and differences. *Rev Neurosci* **30**:107–164.  
938 doi:10.1515/revneuro-2017-0102
- 939 Susswein AJ, Byrne JH. 1988. Identification and characterization of neurons initiating patterned  
940 neural activity in the buccal ganglia of *Aplysia*. *J Neurosci* **8**:2049–2061.
- 941 Susswein AJ, Hurwitz I, Thorne R, Byrne JH, Baxter DA. 2002. Mechanisms underlying fictive  
942 feeding in *Aplysia*: coupling between a large neuron with plateau potentials activity and a  
943 spiking neuron. *J Neurophysiol* **87**:2307–2323. doi:10.1152/jn.2002.87.5.2307
- 944 Takeuchi Y, Narumi R, Akiyama R, Vitiello E, Shirai T, Tanimura N, Kuromiya K, Ishikawa S,  
945 Kajita M, Tada M, Haraoka Y, Akieda Y, Ishitani T, Fujioka Y, Ohba Y, Yamada S,  
946 Hosokawa Y, Toyama Y, Matsui T, Fujita Y. 2020. Calcium Wave Promotes Cell  
947 Extrusion. *Current Biology* **30**:670–681.e6. doi:10.1016/j.cub.2019.11.089
- 948 Tam S, Hurwitz I, Chiel HJ, Susswein AJ. 2020. Multiple Local Synaptic Modifications at  
949 Specific Sensorimotor Connections after Learning Are Associated with Behavioral  
950 Adaptations That Are Components of a Global Response Change. *J Neurosci* **40**:4363–  
951 4371. doi:10.1523/JNEUROSCI.2647-19.2020

- 952 van Helden DF, Imtiaz MS, Nurgaliyeva K, von der Weid P, Dosen PJ. 2000. Role of calcium  
953 stores and membrane voltage in the generation of slow wave action potentials in guinea-  
954 pig gastric pylorus. *J Physiol* **524 Pt 1**:245–265. doi:10.1111/j.1469-7793.2000.00245.x
- 955 Vinogradova TM, Maltsev VA, Bogdanov KY, Lyashkov AE, Lakatta EG. 2005. Rhythmic  
956 Ca<sup>2+</sup> oscillations drive sinoatrial nodal cell pacemaker function to make the heart tick.  
957 *Ann N Y Acad Sci* **1047**:138–156. doi:10.1196/annals.1341.013
- 958 Wacquier B, Combettes L, Van Nhieu GT, Dupont G. 2016. Interplay Between Intracellular Ca  
959 <sup>2+</sup> Oscillations and Ca<sup>2+</sup>-stimulated Mitochondrial Metabolism. *Scientific Reports*  
960 **6**:19316. doi:10.1038/srep19316
- 961 Wacquier B, Voorsluijs V, Combettes L, Dupont G. 2019. Coding and decoding of oscillatory  
962 Ca<sup>2+</sup> signals. *Seminars in Cell & Developmental Biology*, SI: Calcium signalling **94**:11–  
963 19. doi:10.1016/j.semcd.2019.01.008
- 964 Wimmer K, Compte A, Roxin A, Peixoto D, Renart A, de la Rocha J. 2015. Sensory integration  
965 dynamics in a hierarchical network explains choice probabilities in cortical area MT. *Nat*  
966 *Commun* **6**:6177. doi:10.1038/ncomms7177
- 967 Yu X, Byrne JH, Baxter DA. 2004. Modeling interactions between electrical activity and second-  
968 messenger cascades in Aplysia neuron R15. *J Neurophysiol* **91**:2297–2311.  
969 doi:10.1152/jn.00787.2003
- 970 Zhang G, Yu K, Wang T, Chen T-T, Yuan W-D, Yang F, Le Z-W, Guo S-Q, Xue Y-Y, Chen S-  
971 A, Yang Z, Liu F, Cropper EC, Weiss KR, Jing J. 2020. Synaptic mechanisms for motor  
972 variability in a feedforward network. *Sci Adv* **6**. doi:10.1126/sciadv.aba4856
- 973 Zhou Y, Lv M, Li T, Zhang T, Duncan R, Wang L, Lu XL. 2019. Spontaneous calcium signaling  
974 of cartilage cells: from spatiotemporal features to biophysical modeling. *FASEB J*  
975 **33**:4675–4687. doi:10.1096/fj.201801460R
- 976 Zhu L, Selverston AI, Ayers J. 2016. Role of I<sub>h</sub> in differentiating the dynamics of the gastric and  
977 pyloric neurons in the stomatogastric ganglion of the lobster, *Homarus americanus*. *J*  
978 *Neurophysiol* **115**:2434–2445. doi:10.1152/jn.00737.2015
- 979

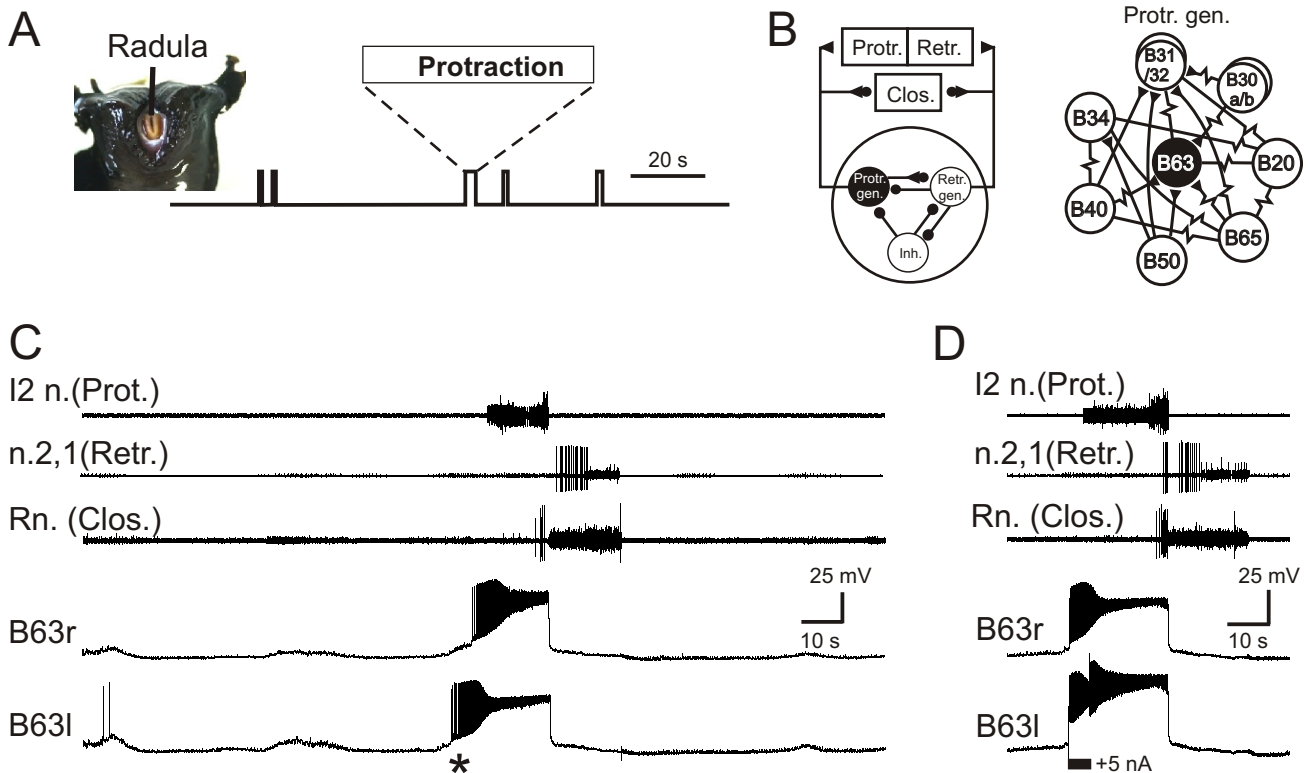

**Figure 1. Aplysia's spontaneous radula biting behavior and underlying motor pattern generation.**

**(A)** In vivo food-seeking behavior. In the absence of any external stimulation, Aplysia's radula (see head frontal view at left) spontaneously produces biting movements consisting of irregularly-timed cycles of radula protraction (upward deflection of movement monitor trace), closure and retraction (downward deflection).

**(B)** Schematics of the buccal CPG network that generates radula biting movements. Left: simplified diagram of the half-center network (one in each of the bilateral buccal ganglia) and its synaptic connections with protraction (Protr.), retraction (Retr.) and closure (Clos.) motoneurons (filled circles and triangles; inhibitory and excitatory connections, respectively). The network producing each bi-phasic cycle of movement is composed of three distinct and synaptically connected neuronal subsets comprising a protraction generator (Protr. gen.), a retraction generator (Retr. gen.) and a group of inhibitory neurons (Inh.). Right: detailed schematic of identified neurons belonging to the protraction generator and their synaptic interconnections (filled triangles, excitatory chemical synapses; resistance symbols, electrical synapses). Within the protraction generator, the neuron B63 (black) is necessary and sufficient to trigger the buccal motor pattern (BMP) for a radula bite cycle.

**(C)** Simultaneous extracellular recordings of a single BMP (top three traces) and intracellular recordings of the two bilateral and electrically-coupled B63 neurons (r, right; l, left) in an isolated in vitro buccal ganglia preparation. I2n., n.2,1, Rn., are respectively the motor nerves carrying axons of protractor, retractor and closure motor neurons. The two B63 cells expressed spontaneous and coincident membrane depolarizations (\*) that initiated plateau potentials and associated impulse bursts, which in turn evoked a BMP by the buccal CPG network.

**(D)** Synchronous plateau potentials in the electrically-coupled B63 and a resulting BMP triggered by a brief intracellular depolarizing current pulse (+5 nA) injected into one (left) B63 neuron.



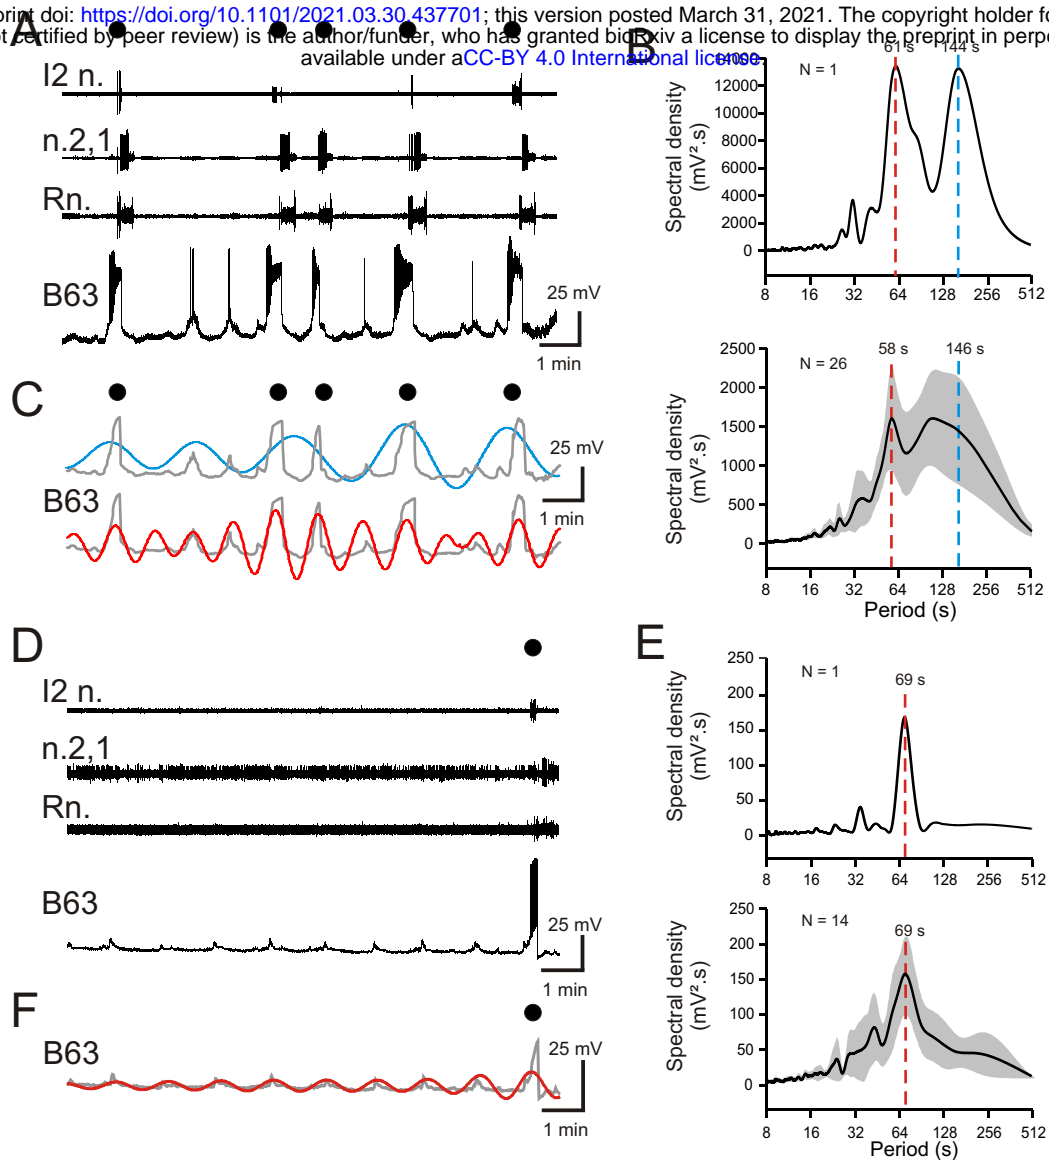

**Figure 2. Periodicities in B63's spontaneous bioelectrical behavior.**

**(A)** A 10 min recording excerpt of radula BMP genesis (black dots) in an in vitro buccal ganglion preparation showing associated spontaneous fluctuations in membrane potential of an intracellularly-recorded B63 neuron. Note that a BMP occurred only when B63 expressed prolonged burst firing driven by a plateau potential.

**(B)** Spectral density plot of the B63 recording illustrated in A (top) and the average power spectrum ( $\pm$  CI95%) from recordings of 26 different neurons (bottom). In both cases, the essentially bimodal periodograms indicated that the variations in B63's membrane potential comprised two distinct periodicities (indicated by red and blue dashed lines), which across all 26 neurons was 58 s and 146 s, respectively. For details see Supplemental Figure 1A.

**(C)** Wavelet-based reconstructions retaining the two dominant periods revealed in the individual power spectrum in B (top) and their superposition with the smoothed membrane voltage traces (gray) of the corresponding B63 neuron in A. The slower sinusoid (blue trace; period, 144 s) corresponded to the cell's strongest depolarizations associated exclusively with the expression of plateau potentials and resultant BMP genesis (black dots). The faster sinusoid (red trace; period, 61 s) corresponded to these supra-threshold depolarizations plus almost all remaining subthreshold depolarizations.

**(D-F)** Equivalent analyses of the same neurons as in A-C, but during recorded excerpts when no plateauing and BMP genesis occurred ( $N = 14$ ). The single plateau potential and BMP occurring at the end of the excerpt in D is illustrated for comparison with the B63 recording in A, but was not included in the spectral analyses of E (see Supplemental Figure 1B). In the absence of plateau potentials, the cells expressed spontaneous variations in membrane potential (D) composed of a single dominant, low-amplitude oscillation (E, F). Note that smaller additional peaks in the power spectra in B, E are essentially harmonics of the major period(s).

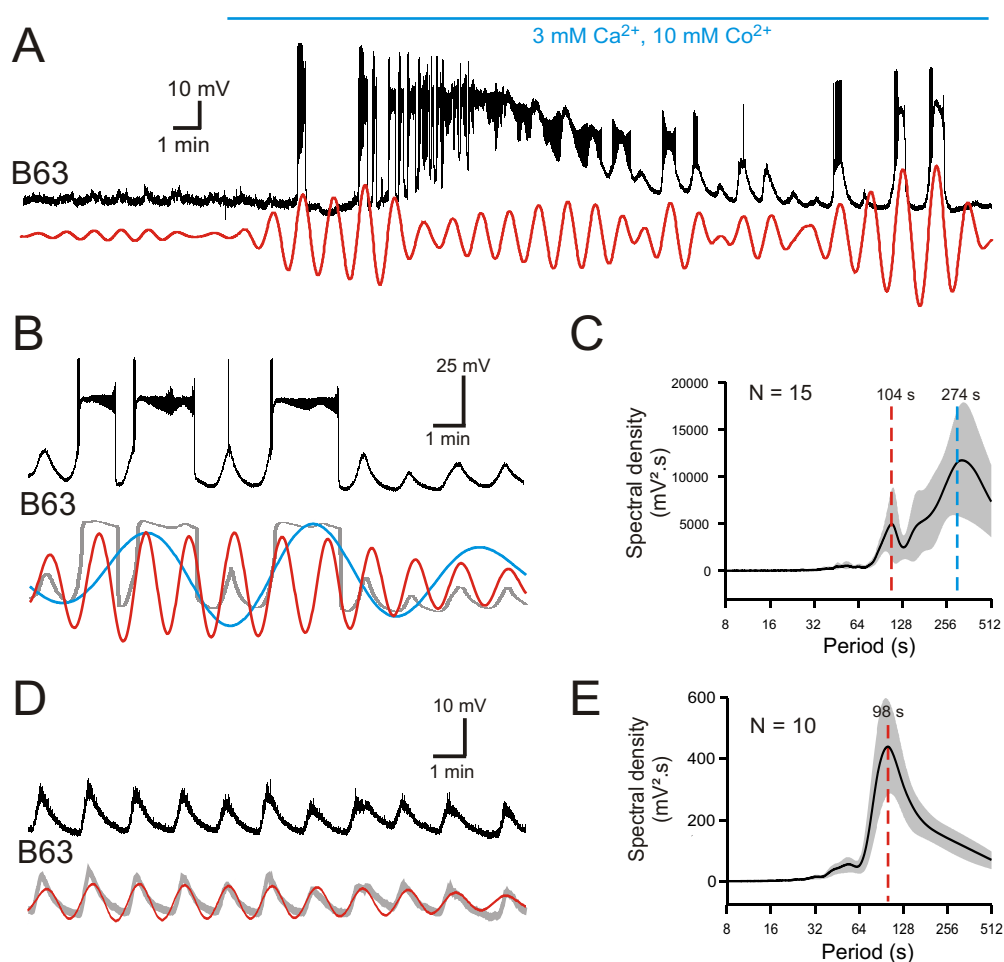

**Figure 3. B63's voltage oscillations in the absence of functional chemical synapses.**

**(A)** Membrane potential fluctuations and plateauing in a recorded B63 neuron immediately before and during onset of bath-applied Low Ca+Co saline (horizontal blue line) to block chemical synapses in the buccal CPG network. Red trace: corresponding reconstructed waveform from the peak spectral density (period range: 70-90 s).

**(B,C)** A different B63 cell recorded 20 min after onset of Low Ca+Co perfusion (B, Top trace; also see Supplemental Figure 1C). The membrane potential variations decomposed into two oscillatory waveforms (B, red and blue traces) with periods of 83 and 280 s, respectively. Gray trace: raw recording after smoothing. (C) Average power spectrum (mean period  $\pm$  CI95%) from 15 neurons showing two major oscillations.

**(D,E)** Same analysis as in B,C, but of B63 recording sequences without plateau potential generation (also see Supplemental Figure 1D). The remaining spontaneous variations in membrane potential now comprised a single oscillation (D, red trace: period 85 s), as also indicated by the solitary dominant period in the averaged periodogram (mean  $\pm$  CI95%) from 10 B63 neurons (E).

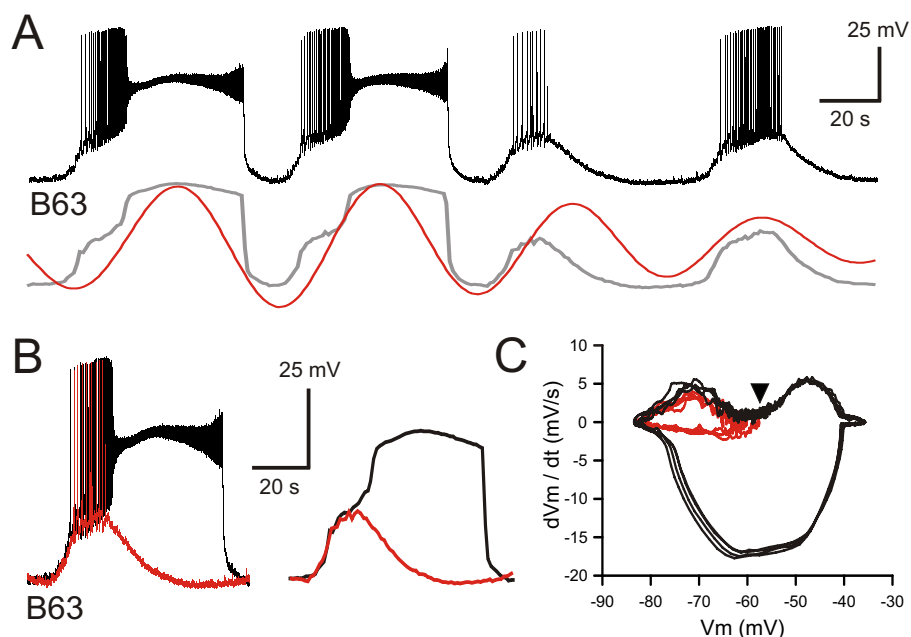

**Figure 4. B63's voltage oscillation triggers plateau potentials.**

**(A)** Intracellular recording of a B63 neuron under chemical synapse blockade during an excerpt in which each spontaneous voltage oscillation was associated (first two cycles) or not (last two cycles) with the expression of plateau potentials. Bottom traces: corresponding smoothed recording (gray trace) and reconstructed oscillation from the peak spectral density (red trace; period 64 s).

**(B)** Left: superposition of the first oscillation cycle in A with an accompanying plateau (black trace) and the third cycle without a plateau (red trace). Right: same traces after low-pass filtering to remove action potentials.

**(C)** Phase-plane plot of 8 successive oscillation cycles both without (4 cycles, red), and with (4 cycles, black) plateau potential generation in the same B63 neuron as in B, C. The initial raising phases of the sub- and supra-threshold depolarizations follow identical trajectories before either a return to baseline potential or a further depolarization into a prolonged plateau. The arrowhead indicates the voltage threshold for plateau potential generation.



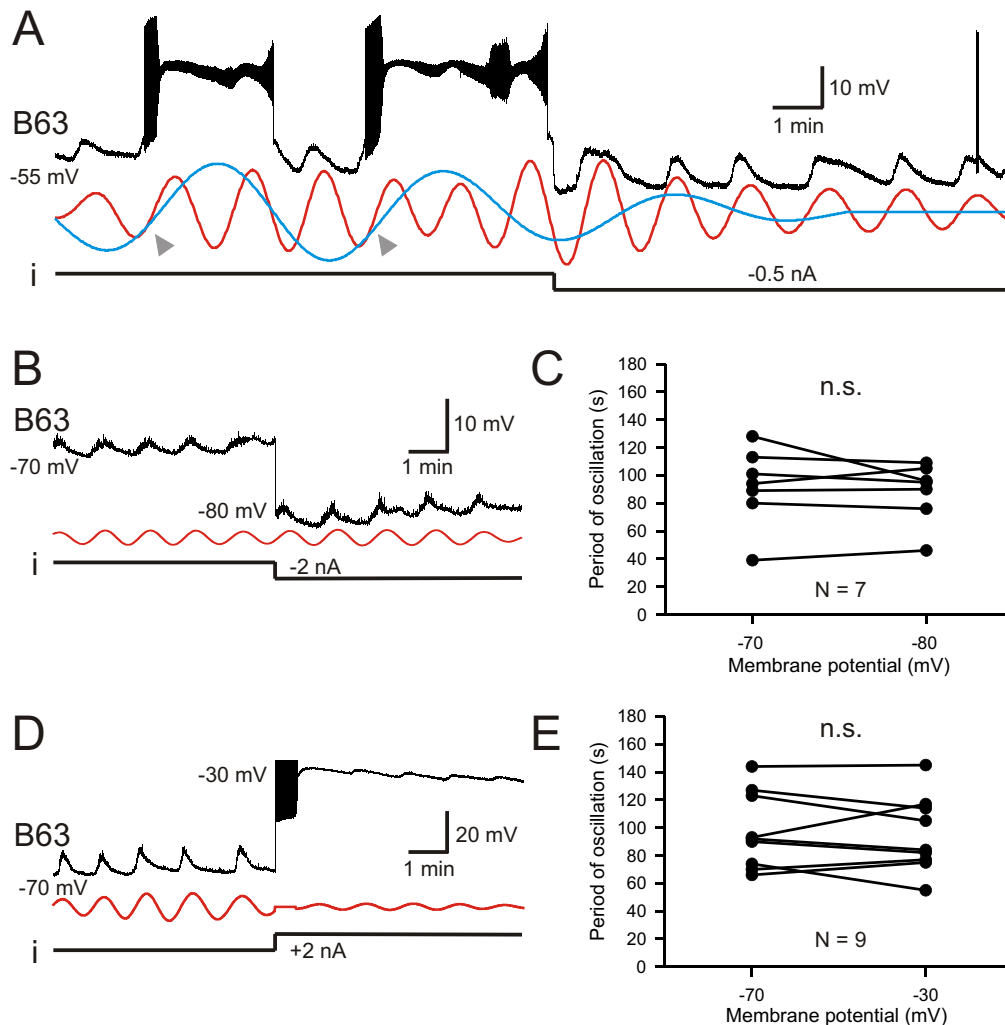

**Figure 5. B63's low-amplitude oscillation does not arise from a voltage-sensitive mechanism.**

**(A)** Under chemical synapse blockade (with Low Ca+Co saline), a B63 neuron's spontaneous plateau potentials, but not its low-amplitude voltage oscillation, is suppressed by continuous hyperpolarizing current injection (i, -0.5 nA). Red and blue traces: superimposed reconstructed waveforms from the peak spectral densities corresponding to the presence or absence of plateau potentials. Arrowheads indicate the points of waveform intersection where plateau potentials were initiated.

**(B)** Low-amplitude oscillation (upper trace) in a different B63 neuron during continuous hyperpolarization with chemical synapses blocked. The cell's membrane potential was held at -70 mV then stepped to -80 mV by continuous intracellular current injection (i) with two-electrode current clamp. Red trace: reconstructed waveform from the peak spectral density (period 80 s).

**(C)** The oscillation cycle periods of all 7 recorded neurons were not significantly (n.s.) modified by the same membrane potential manipulation ( $V = 16$ ,  $p = 0.799$ ).

**(D,E)** Same analysis as in B,C, but with the membrane potential initially held at -70, then depolarized to -30 mV with two-electrode current clamp (D). Red trace: reconstructed waveform from the peak spectral density (period: 70 s). (E) No significant difference (n.s.) in oscillation period in 9 recorded neurons at these two holding potentials ( $V = 28$ ,  $p = 0.553$ ).

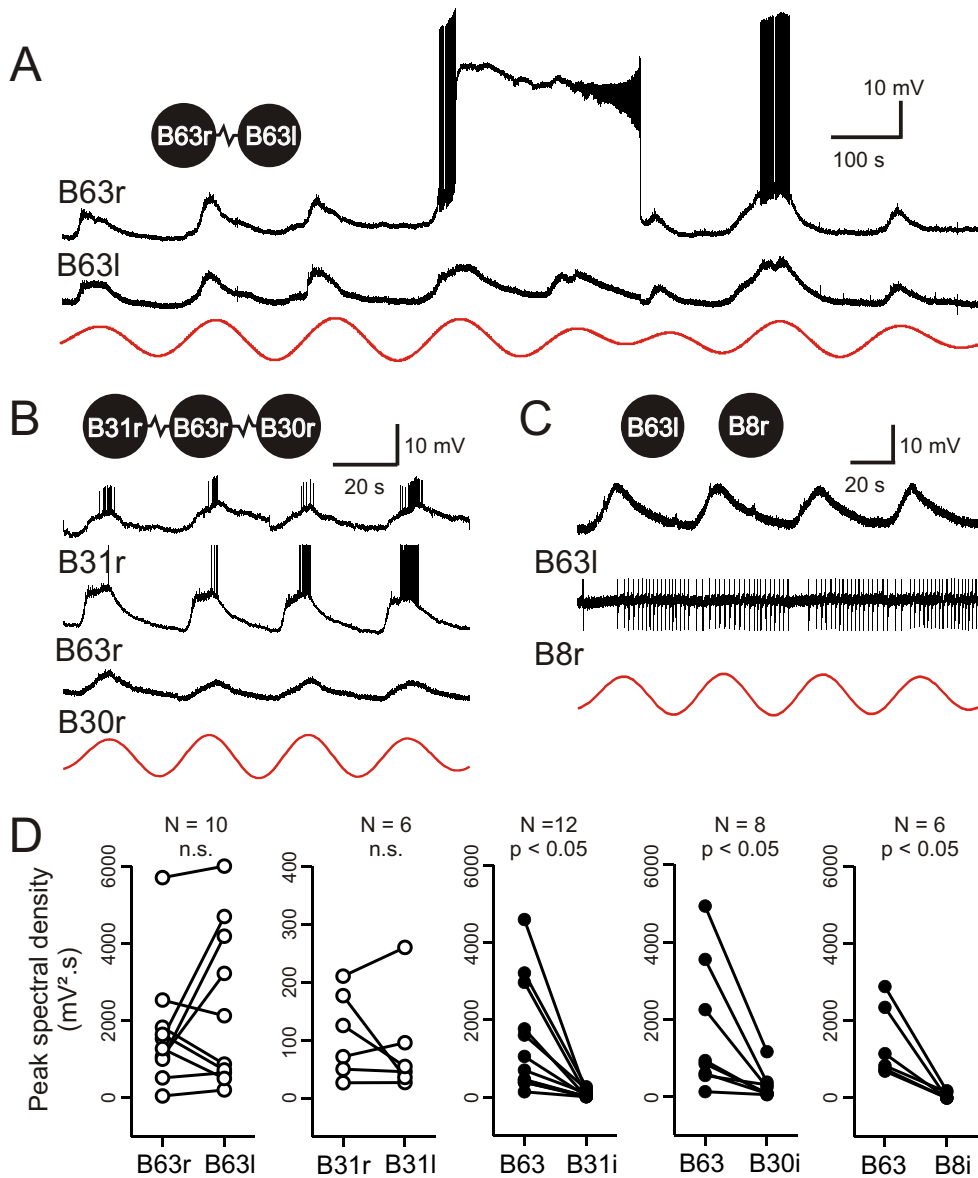

**Figure 6. Low-amplitude oscillation in electrically-coupled network neurons.**

**(A,B)** Simultaneous intracellular recordings from different protraction generator neurons under chemical synapse blockade. **(A)** Spontaneous membrane potential oscillations in the right (r) and left (l) electrically-coupled B63 cells (resistance symbol: electrical synapse). Note the independent expression of a plateau potential and burst firing in B63r. **(B)** Coordinated oscillations in a right B63 and ipsilateral, electrically-coupled B31 and B30 neurons (the action potentials in the B63 trace are truncated). Red traces in A and B: reconstructed waveforms from the peak spectral densities for B63l and B63r, respectively.

**(C)** Recordings from a B63 along with a non-coupled contralateral B8 motor neuron (action potentials in the B8 trace are truncated). A membrane voltage oscillation was absent in B8. Red trace: reconstructed waveform from the peak spectral density for B63.

**(D)** Comparison of oscillation magnitude (i.e., peak spectral amplitude) in contralateral (unfilled dots; l, left; r, right) and ipsilateral neurons (i, filled dots). The oscillation amplitude was not significantly different (n.s.) in bilateral homologous cells (white dots; B63r/B63l,  $V = 22$ ,  $p = 0.625$ ; B31r/B31l,  $V = 13$ ,  $p = 0.688$ ), but was significantly higher in B63 compared to heterologous neurons in the same (i, ipsilateral) ganglion (black dots; B63/B31i,  $V = 78$ ,  $p = 0.005$ ; B63/B30i,  $V = 36$ ,  $p = 0.008$ ; B63/B8i,  $V = 21$ ,  $p = 0.031$ ).

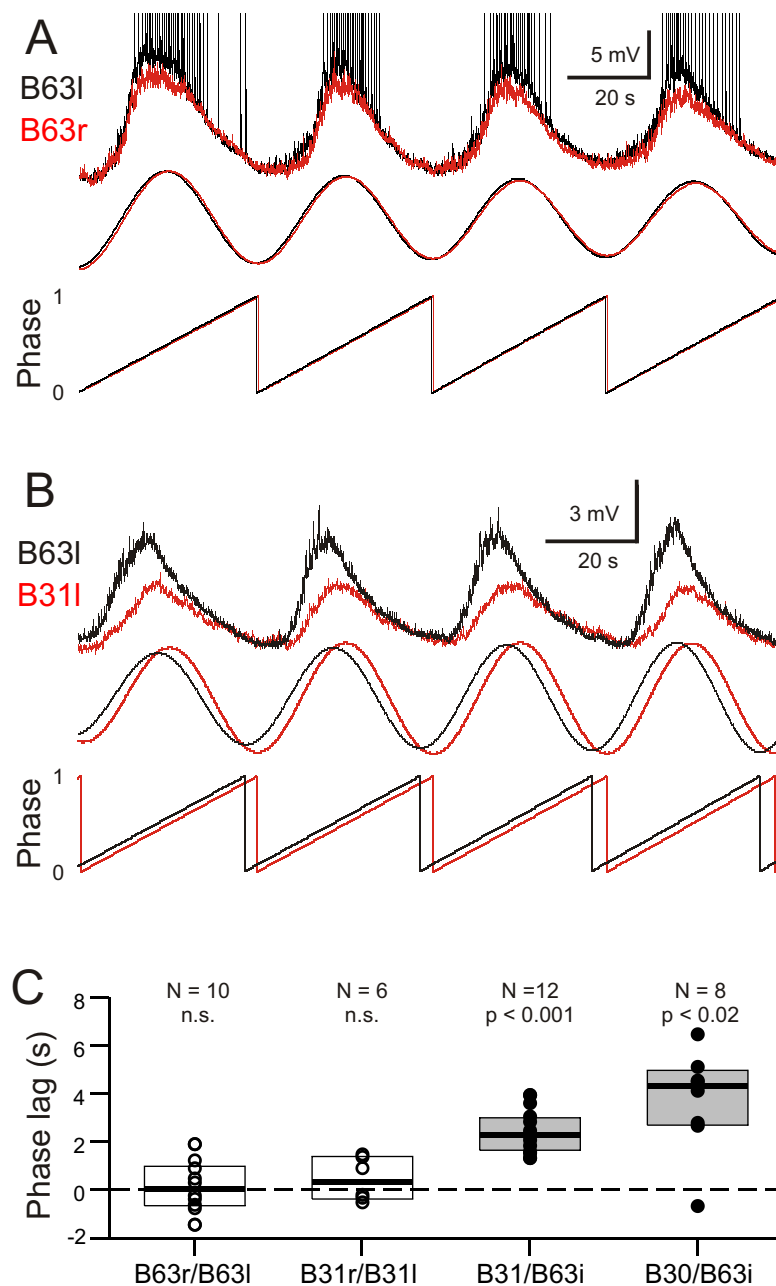

**Figure 7. Phase-relationships between the oscillations of different network neurons.**

**(A,B)** Upper traces: Superimposed phase-aligned intracellular recordings from different neuronal pairs - A), left (black) and right B63 (red); B), left B63 (black) and left B31 (red) - under chemical synapse blockade (action potentials in B63l are truncated). Middle traces, reconstructed waveforms from the corresponding spectral periodograms after equivalence amplitude scaling. Lower traces: superimposed representations of the oscillation phases in each cell pair. No phase difference was evident between the two B63 neurons (A). In contrast, the oscillation of B63 (black) was phase-advanced relative to that of B31 (B).

**(C)** One-sample analyses showing that the oscillation phases in homologous bilateral neurons were not significantly (n.s.) different from zero (unfilled dots and boxes; B63r/B63l,  $V_0 = 31$ ,  $p = 0.770$ ; B31r/B31l,  $V_0 = 15$ ,  $p = 0.438$ ). In contrast, oscillations in heterologous neurons were significantly delayed (i.e., positive phase lag) relative to the ipsilateral (i) B63 partner (filled dots and boxes; B31/B63i,  $V_0 = 78$ ,  $p = 0.0005$ ; B30/B63i,  $V_0 = 35$ ,  $p = 0.016$ ).

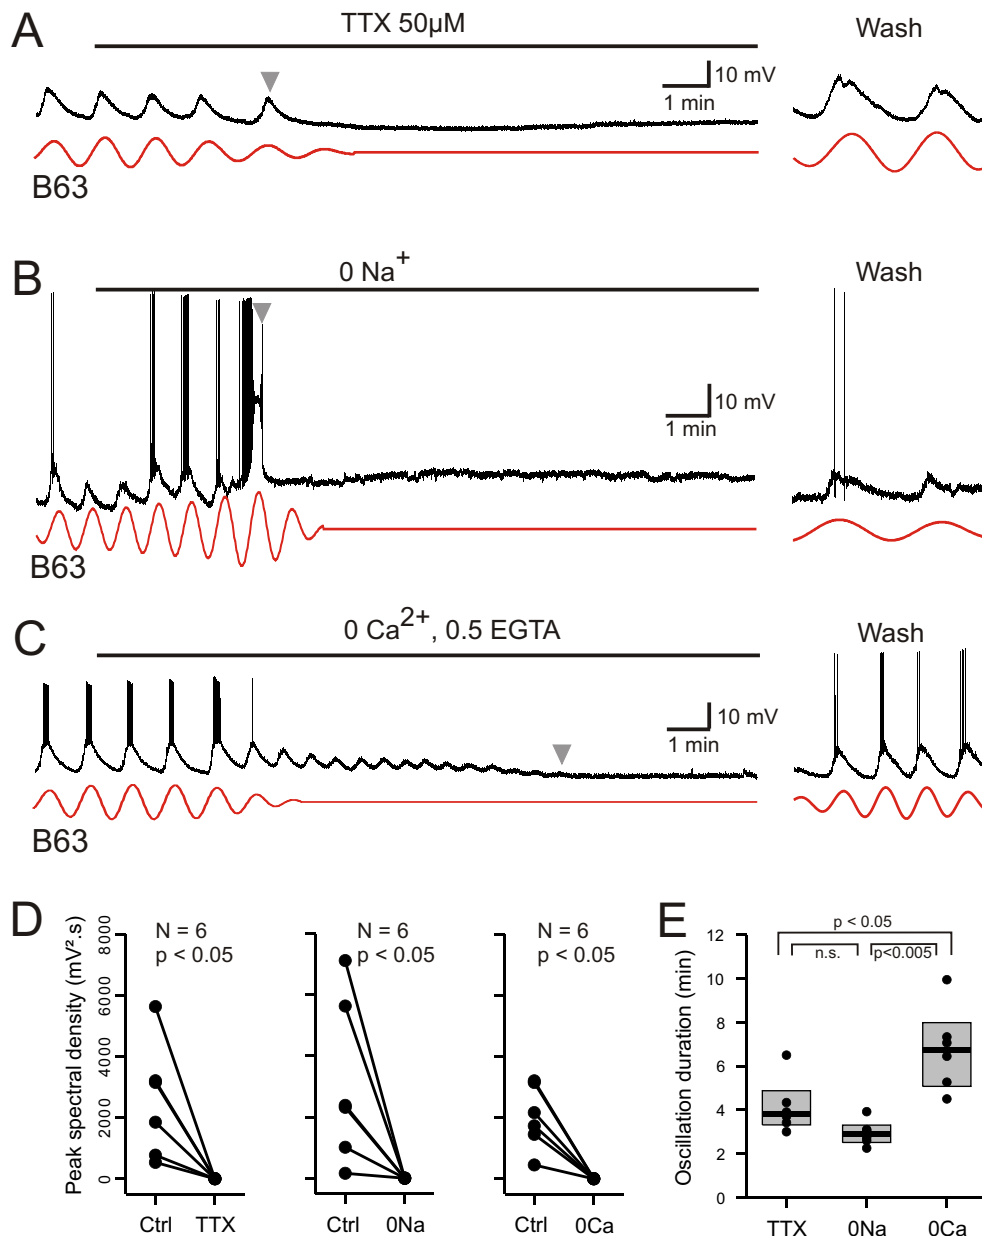

**Figure 8. Involvement of sodium and calcium ions in the voltage oscillation.**

**(A-C)** Under chemical synapse blockade, the spontaneous voltage oscillations of B63 neurons were reversibly (trace excerpts at right) suppressed by bath application of 50 µM tetrodotoxin (A, horizontal line), sodium-free (B, horizontal line) or calcium-free salines (C, horizontal line). Red traces: reconstructed waveforms from corresponding peak spectral densities.

**(D)** Group quantification under the experimental conditions illustrated in A-C: The amplitude of the dominant oscillation in Low Ca+Co saline alone (Control, Ctrl) was significantly reduced after application of TTX-containing (left,  $V = -21$ ,  $p = 0.031$ ), Na-free (middle,  $V = -21$ ,  $p = 0.031$ ), or calcium-free saline (right,  $V = -21$ ,  $p = 0.031$ ).

**(E)** Inter-group comparison of oscillation longevity (grey arrowheads in A-C) after modified-saline perfusion onset ( $H = 11.684$ ,  $p < 0.005$ ). B63's oscillation persisted for significantly longer after removal of extracellular calcium (0 Ca + 0.5 EGTA,  $N = 6$ ) than after blockade of sodium channels by TTX ( $N = 6$ ,  $q = 4.625$ ,  $p = 0.013$ ) or in the absence of extracellular Na ( $N = 6$ ,  $q = 8.092$ ,  $p < 0.005$ ). No significant difference was evident between the effects of sodium channel blockade or Na removal ( $q = -3.468$ ).

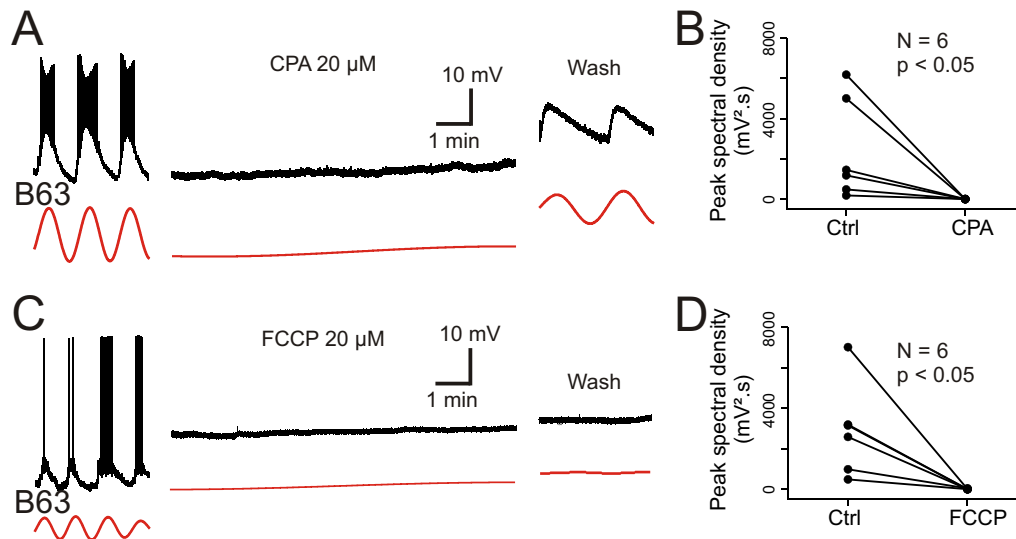

**Figure 9. Involvement of intracellular calcium stores in the voltage oscillation.**

**(A)** The spontaneous voltage oscillation of a B63 neuron (left excerpt) was reversibly (right excerpt) suppressed in the presence of 20 μM CPA, a SERC inhibitor (middle excerpt, recorded 20 min after the beginning of drug application).

**(B)** Group analysis showing a significant reduction in oscillation magnitude of 6 B63 neurons measured before (Ctrl) and 20 min after the beginning of CPA application ( $V = 21$ ,  $p = 0.031$ ).

**(C)** Suppression of B63 oscillation by application of 20 μM FCCP, an uncoupler of mitochondrial oxidative phosphorylation leading to calcium release. The neuron's spontaneous oscillation (left) was irreversibly (right) suppressed and the cell depolarized (middle, recorded 20 min after the beginning of drug application).

**(D)** The oscillation magnitudes (Ctrl) of 6 tested B63 neurons were significantly reduced ( $V = 21$ ,  $p = 0.031$ ) after 20 min of FCCP application.

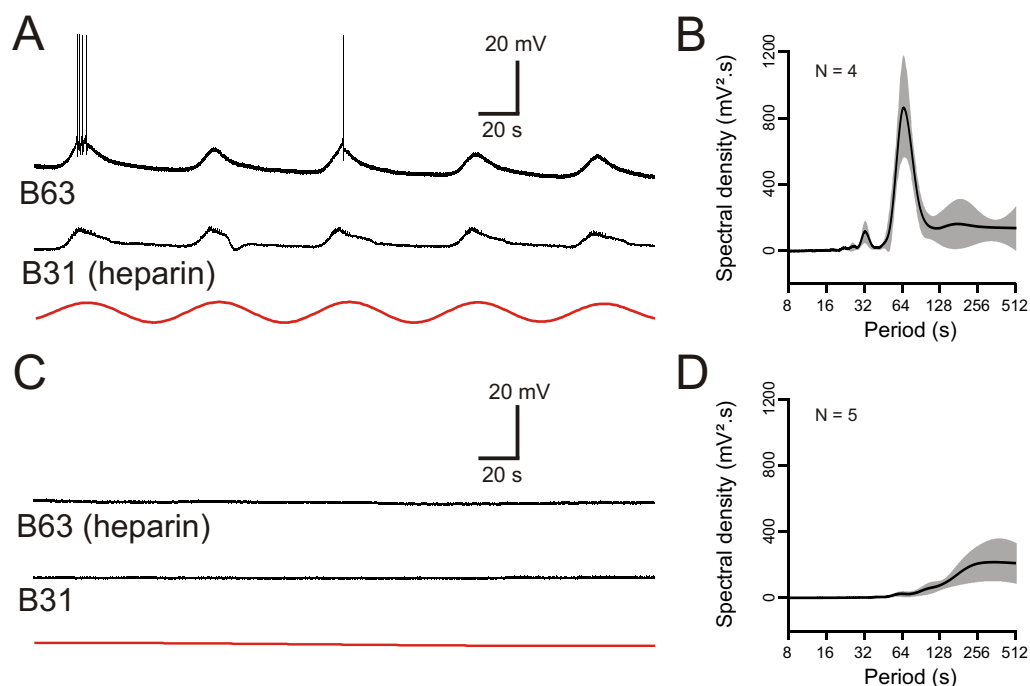

**Figure 10. The voltage oscillation generated by intracellular calcium store release is specific to B63.**

**(A,C)** Paired recordings of B63 and B31 neurons under chemical synapse blockade, 30 min after the beginning of an intrasomatic injection of the ER membrane calcium channel blocker heparin (20 mg/ml) into either the bilateral B31 (A) or bilateral B63 (C) neurons. Heparin in B31 had no effect on the ongoing oscillation of an un-injected B63 cell (A), but suppressed oscillations in both a B63 and an un-injected B31 (C) after injection into both B63 neurons. Red traces: reconstructed waveforms from the corresponding periodograms.

**(B,D)** Average power spectra obtained 30 min after the beginning of bilateral intracellular heparin injection into the B31 (B) or B63 neurons (D) in 4 and 5 preparations, respectively.

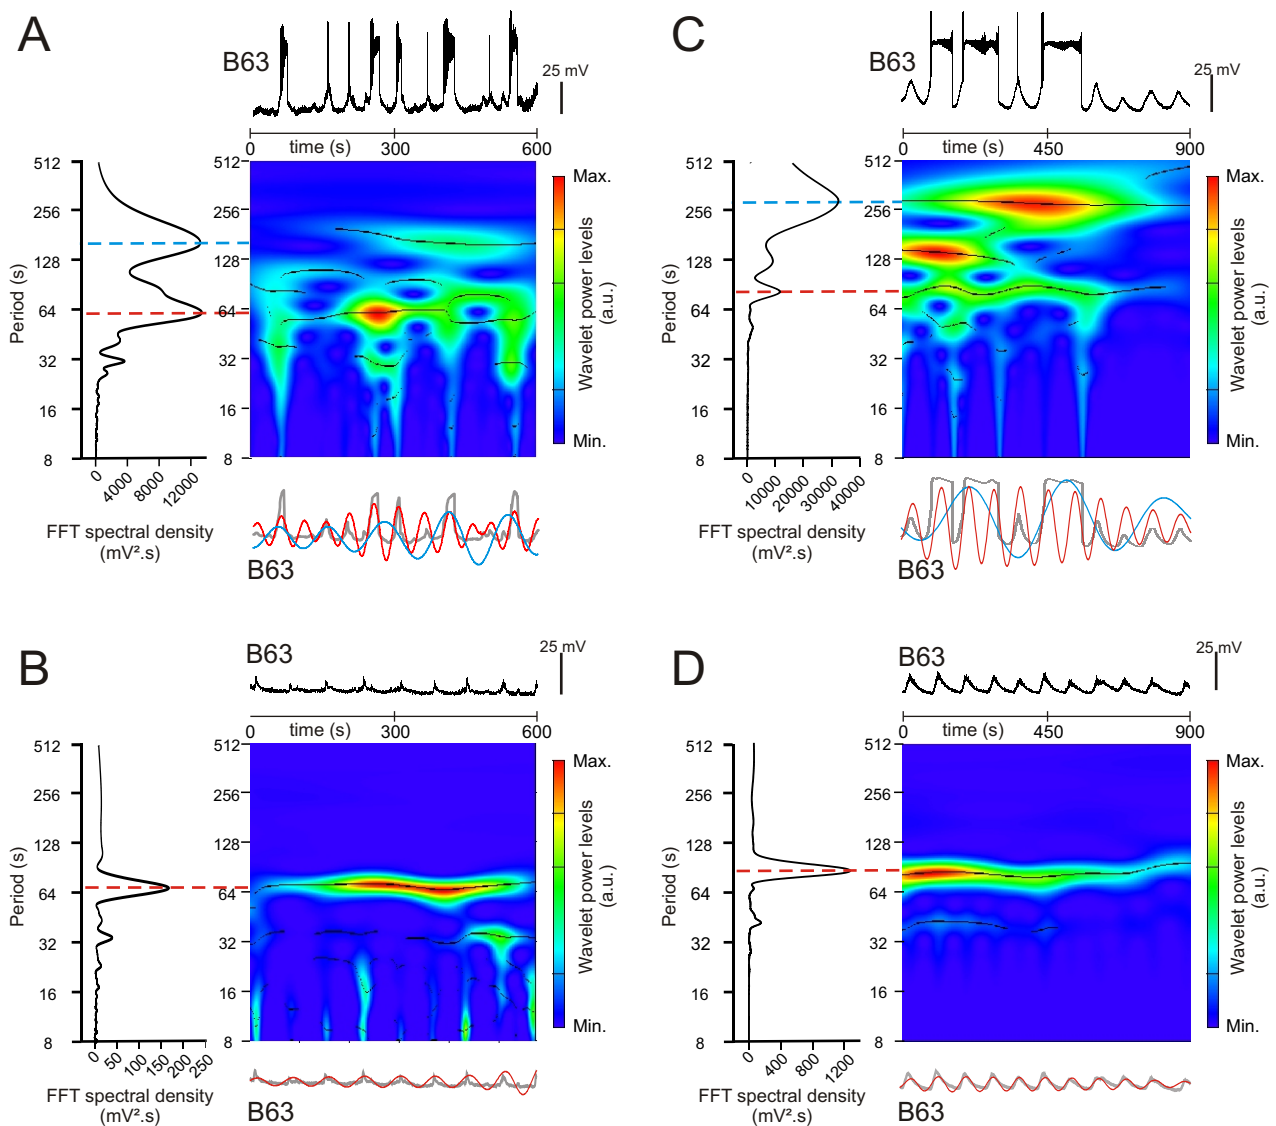

### Supplemental Figure 1. Spectral density analysis of B63 neuron intracellular recordings.

**A,B.** Analysis under normal saline (ASW) conditions. Colored panels (middle) are wavelet-based power spectral decompositions of the membrane potential variations over time in the B63 cell recording excerpt shown at top (Color code bars: power; black lines: ridges of power). Plots at left are periodograms from Fast Fourier Transform (FFT) of the same intracellular recordings used to quantify spectral densities (i.e., amplitudes) at dominant periods (indicated by red and blue lines) of voltage changes in the period range between 8 and 512 s. Note that event period (in secs) rather than its reciprocal (frequency) was used in the time domain due to the very slow spontaneous rates of membrane potential fluctuations (see Materials and Methods). Bottom traces are mathematically-reconstructed oscillations from the dominant periods revealed in the FFT periodograms (red and blue traces) superimposed with the corresponding intracellular recording excerpt after low pass filter smoothing to remove action potentials (gray traces). The recordings in A and B, and corresponding wavelet power spectra, periodograms and reconstructed oscillations, are from the same B63 neuron with (A) or without (B) the spontaneous expression of plateau potentials, as reported in Figure 2.

**C,D.** Equivalent analysis under Low Ca+Co saline conditions to block chemical synapses. The intracellular recordings (Top traces) and corresponding wavelet and FFT power spectral decomposition and reconstructed waveforms are from the same B63 neuron with (C) or without (D) spontaneous plateau potential generation, as reported in Figure 3.

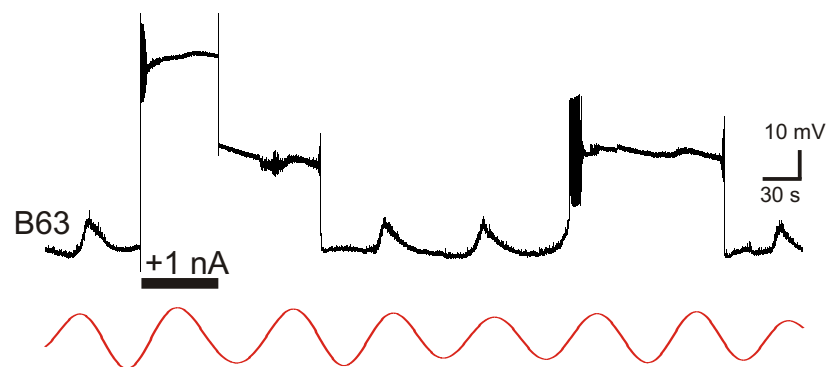

**Supplemental Figure 2. B63 plateau potentials expressed with chemical synapses blocked.**

Intracellular recording of a B63 neuron in a buccal ganglion under bath-applied Low Ca+Co saline. A transient intracellular injection of depolarizing current (horizontal bar, +1nA) elicited a prolonged plateau potential that was similar to a subsequent plateau triggered spontaneously on a depolarizing phase of ongoing membrane potential oscillation. The red trace is the corresponding reconstructed waveform from the peak spectral density; period 71 s.



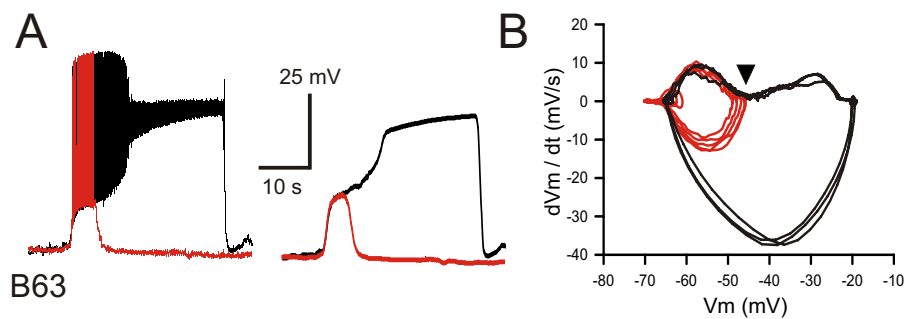

**Supplemental Figure 3. B63's voltage oscillation triggers plateau potentials under normal saline (ASW) conditions.**

**A.** Left: superposition of an oscillation cycle without a plateau (red trace) and one leading to a plateau (black trace) recorded in the absence of chemical synapse blockade. Right: same traces after low-pass filtering to remove action potentials.

**B.** Phase-plane plot of 8 successive oscillation cycles both without (5 cycles; red), and with (3 cycles; black) plateau potential generation in the same B63 neuron. The arrowhead indicates the voltage threshold for plateau potential generation.

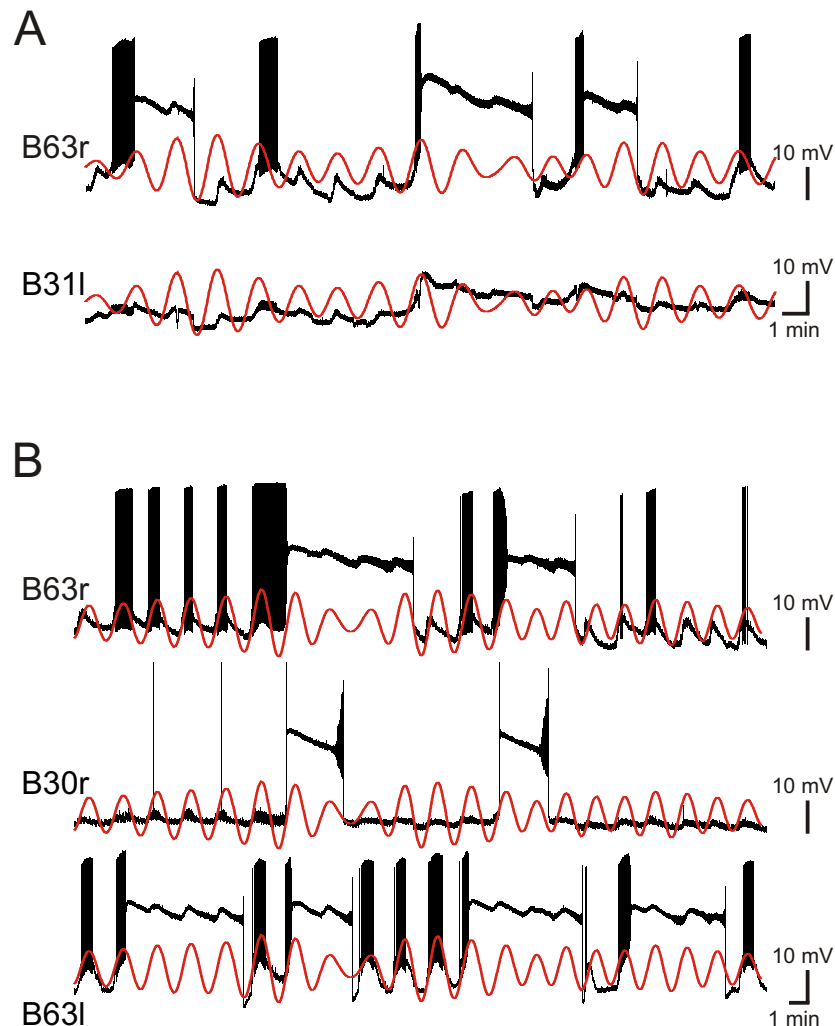

**Supplemental Figure 4. Irregular plateau potentials triggered by regular voltage oscillations in electrically-coupled network neurons.**

**A.** Paired intracellular recordings from two gap junction-coupled neurons (right B63 and left B31) under chemical synapse blockade. In contrast to the continuous synchronous and rhythmic depolarizations (see red traces, which are the reconstructed voltage oscillation of B63 superimposed with both the raw B63 and B31 recordings), the production of plateau potentials was irregular and occurred independently in the two neurons.

**B.** Simultaneous recordings from three gap junction-coupled neurons (right B63, right B30 and left B63) under chemical synapse blockade. All three cells expressed synchronous, rhythmic depolarizations (red traces: reconstructed voltage oscillation of right B63 superimposed with all raw recordings), but again, the onsets and terminations of plateau potentials were highly irregular within and between the individual neurons.

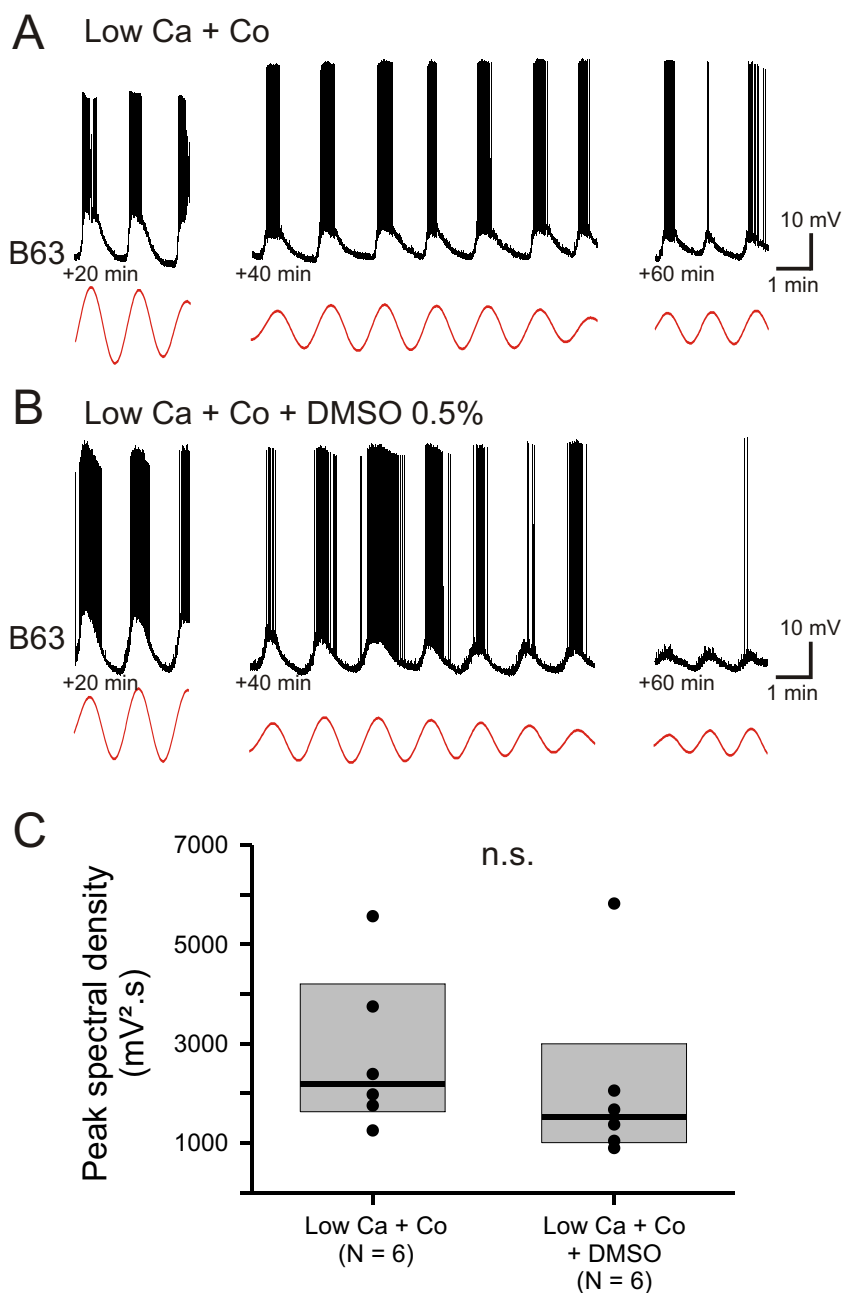

**Supplemental Figure 5. The voltage oscillation of B63 is unaffected by exposure to DMSO.**

**A,B.** Recordings from two different B63 neurons during bath-application of Low Ca+Co saline alone (A) or additionally containing 0.5% DMSO (B). Left trace excerpts: 20 min after the beginning of the perfusion. Middle traces: 40 min after perfusion onset. Right traces: 60 min after perfusion onset. Red traces: reconstructed waveforms from the corresponding peak spectral densities.

**C.** Group comparison of oscillation magnitudes in B63 cells measured from 20 until 30 min after the beginning of saline perfusion in the absence (left) and presence of 0.5% DMSO (right). DMSO had no significant (n.s.) effect on the amplitudes of the voltage oscillations (Mann-Whitney rank sum test:  $V = 25$ ,  $p = 0.310$ ).
